# Supplementary material for: The Essential Oil Composition and Antimicrobial Activity of Liquidambar formosana Oleoresin
Source: PubMed Central journal article supplement (PMC7412184; doi:10.3390/plants9070822), 2020-06-30
Supplement: plants-09-00822-s001.pdf [file plants-09-00822-s001.pdf]

| RI <sub>cal</sub><br>c | RI <sub>lab</sub> | Compound                                       | RE1904<br>01A | RE1904<br>01D | RE190<br>401E | LD190<br>910C | LD1909<br>10D | LD190<br>910E | LD190<br>910F |
|------------------------|-------------------|------------------------------------------------|---------------|---------------|---------------|---------------|---------------|---------------|---------------|
| 1145                   | 1143              | <i>trans</i> -Dihydro- $\beta$ -terpineol      | 0.00          | 0.00          | 0.00          | 0.00          | 0.00          | 0.00          | 0.00          |
| 1148                   | 1146              | <i>trans</i> -Verbenol                         | 0.00          | 0.01          | 0.02          | 0.00          | 0.08          | 0.03          | 0.01          |
| <b>1150</b>            | <b>1149</b>       | <b>Camphor</b>                                 | <b>7.87</b>   | <b>1.62</b>   | <b>2.80</b>   | <b>4.15</b>   | <b>3.60</b>   | <b>0.72</b>   | <b>0.55</b>   |
| 1151                   | 1149              | <i>trans</i> -Dihydro- $\alpha$ -terpineol     | 0.00          | 0.00          | 0.00          | 0.00          | 0.00          | 0.00          | 0.00          |
| 1152                   | 1150              | $\alpha$ -Phellandren-8-ol                     | 0.00          | 0.00          | 0.00          | 0.00          | 0.01          | 0.00          | 0.00          |
| 1158                   | 1156              | Camphene hydrate                               | 0.04          | 0.00          | 0.00          | 0.07          | 0.01          | 0.01          | 0.00          |
| 1159                   | 1157              | Sabina ketone                                  | 0.00          | 0.00          | 0.00          | 0.00          | 0.00          | 0.00          | 0.00          |
| 1160                   | 1158              | Menthone                                       | 0.00          | 0.00          | 0.00          | 0.00          | 0.00          | 0.00          | 0.00          |
| 1163                   | 1160              | <i>trans</i> -Pinocamphone                     | 0.00          | 0.00          | 0.00          | 0.01          | 0.02          | 0.01          | 0.00          |
| 1165                   | 1164              | Pinocarvone                                    | 0.03          | 0.03          | 0.02          | 0.02          | 0.01          | 0.03          | 0.01          |
| 1167                   | 1164              | <i>cis</i> -Dihydro- $\alpha$ -terpineol       | 0.00          | 0.00          | 0.00          | 0.00          | 0.00          | 0.00          | 0.00          |
| 1167                   | 1165              | Isoborneol                                     | 0.00          | 0.00          | 0.00          | 0.00          | 0.01          | 0.00          | 0.00          |
| 1170                   | 1171              | 4-Ethylphenol                                  | 0.00          | 0.00          | 0.00          | 0.00          | 0.00          | 0.00          | 0.00          |
| <b>1175</b>            | <b>1173</b>       | <b>Borneol</b>                                 | <b>0.13</b>   | <b>0.79</b>   | <b>1.04</b>   | <b>0.14</b>   | <b>0.65</b>   | <b>0.29</b>   | <b>0.56</b>   |
| 1179                   | 1176              | <i>cis</i> -Pinocamphone                       | 0.19          | 0.00          | 0.00          | 0.02          | 0.02          | 0.01          | 0.01          |
| 1181                   | 1179              | <i>iso</i> -Menthol                            | 0.00          | 0.00          | 0.00          | 0.02          | 0.00          | 0.00          | 0.00          |
| 1181                   | 1179              | 2-Isopropenyl-5-methyl-4-hexenal               | 0.00          | 0.00          | 0.00          | 0.00          | 0.00          | 0.00          | 0.00          |
| 1184                   | 1180              | Terpinen-4-ol                                  | 0.38          | 0.15          | 0.11          | 0.46          | 0.27          | 0.19          | 0.15          |
| 1187                   | 1183              | Myrtanal                                       | 0.00          | 0.00          | 0.00          | 0.00          | 0.00          | 0.00          | 0.00          |
| 1190                   | 1187              | Cryptone                                       | 0.00          | 0.00          | 0.00          | 0.00          | 0.00          | 0.01          | 0.00          |
| 1190                   | 1189              | <i>p</i> -Cymen-8-ol                           | 0.02          | 0.00          | 0.00          | 0.00          | 0.00          | 0.01          | 0.00          |
| 1198                   | 1202              | Myrtenol                                       | 0.00          | 0.00          | 0.00          | 0.00          | 0.00          | 0.00          | 0.00          |
| 1199                   | 1195              | $\alpha$ -Terpineol                            | 0.22          | 0.44          | 0.29          | 0.18          | 0.32          | 0.44          | 0.42          |
| 1202                   | 1198              | ( <i>Z</i> )-Dihydrocarvone                    | 0.04          | 0.00          | 0.00          | 0.00          | 0.00          | 0.00          | 0.00          |
| 1202                   | 1201              | Estragole (= Methyl chavicol)                  | 0.00          | 0.00          | 0.00          | 0.00          | 0.00          | 0.00          | 0.03          |
| 1211                   | 1208              | Verbenone                                      | 0.21          | 0.01          | 0.05          | 0.04          | 0.05          | 0.02          | 0.01          |
| 1234                   | 1235              | Hydrocinnamic alcohol (= Benzenepropanol)      | 0.00          | 0.57          | 0.10          | 0.00          | 0.00          | 0.00          | 0.00          |
| 1235                   | 1232              | <i>cis</i> -Carveol                            | 0.00          | 0.00          | 0.00          | 0.00          | 0.00          | 0.00          | 0.00          |
| 1247                   | 1246              | Carvone                                        | 0.07          | 0.00          | 0.00          | 0.00          | 0.00          | 0.00          | 0.00          |
| 1250                   | 1246              | <i>trans</i> -Shisool                          | 0.00          | 0.00          | 0.00          | 0.00          | 0.00          | 0.00          | 0.00          |
| 1274                   | 1276              | 2,3-Pinenediol                                 | 0.00          | 0.00          | 0.00          | 0.00          | 0.00          | 0.00          | 0.00          |
| 1278                   | 1273              | ( <i>E</i> )-Cinnamaldehyde                    | 0.00          | 0.14          | 0.01          | 0.00          | 0.00          | 0.04          | 0.01          |
| 1280                   | 1278              | Perilla aldehyde                               | 0.00          | 0.00          | 0.02          | 0.00          | 0.00          | 0.00          | 0.00          |
| 1283                   | 1278              | <i>cis</i> -Verbenyl acetate                   | 0.00          | 0.00          | 0.00          | 0.00          | 0.00          | 0.00          | 0.00          |
| <b>1286</b>            | <b>1285</b>       | <b>Bornyl acetate</b>                          | <b>0.09</b>   | <b>0.37</b>   | <b>0.86</b>   | <b>0.04</b>   | <b>1.03</b>   | <b>0.12</b>   | <b>1.31</b>   |
| 1287                   | 1287              | Isobornyl acetate                              | 0.00          | 0.00          | 0.00          | 0.00          | 0.00          | 0.00          | 0.00          |
| 1300                   | 1297              | <i>p</i> -Menth-1-en-9-ol                      | 0.00          | 0.00          | 0.00          | 0.00          | 0.04          | 0.00          | 0.00          |
| 1300                   | 1299              | Perilla alcohol                                | 0.04          | 0.02          | 0.04          | 0.00          | 0.00          | 0.00          | 0.00          |
| 1300                   | 1300              | Carvacrol                                      | 0.03          | 0.00          | 0.00          | 0.00          | 0.00          | 0.00          | 0.00          |
| 1309                   | 1309              | ( <i>E</i> )-Cinnamyl alcohol                  | 0.00          | 0.47          | 0.05          | 0.00          | 0.00          | 0.00          | 0.00          |
| 1331                   | 1334              | Bicycloelemene                                 | 0.00          | 0.00          | 0.02          | 0.00          | 0.00          | 0.00          | 0.00          |
| 1334                   | 1335              | $\delta$ -Elemene                              | 0.00          | 0.00          | 0.08          | 0.00          | 0.00          | 0.00          | 0.00          |
| <b>1349</b>            | <b>1349</b>       | <b><math>\alpha</math>-Cubebene</b>            | <b>0.14</b>   | <b>2.51</b>   | <b>0.50</b>   | <b>0.03</b>   | <b>0.02</b>   | <b>0.13</b>   | <b>0.04</b>   |
| 1352                   | 1352              | Ethyl hydrocinnamate                           | 0.00          | 0.00          | 0.00          | 0.00          | 0.00          | 0.00          | 0.00          |
| 1371                   | 1367              | Cyclosativene                                  | 0.12          | 0.57          | 0.31          | 0.04          | 0.01          | 0.10          | 0.05          |
| 1377                   | 1375              | $\alpha$ -Copaene                              | 0.05          | 0.36          | 0.17          | 0.04          | 0.18          | 0.57          | 0.11          |
| 1380                   | 1384              | Daucene                                        | 0.00          | 0.01          | 0.00          | 0.00          | 0.00          | 0.00          | 0.00          |
| 1383                   | 1383              | <i>cis</i> - $\beta$ -Elemene                  | 0.12          | 0.00          | 0.24          | 0.00          | 0.00          | 0.00          | 0.00          |
| 1383                   | 1385              | Isopropyl 3-phenylpropanoate                   | 0.00          | 0.00          | 0.00          | 0.00          | 0.00          | 0.00          | 0.00          |
| 1385                   | 1382              | $\beta$ -Bourbonene                            | 0.01          | 0.02          | 0.04          | 0.00          | 0.01          | 0.02          | 0.01          |
| <b>1389</b>            | <b>1392</b>       | <b><math>\beta</math>-Cubebene</b>             | <b>0.46</b>   | <b>1.22</b>   | <b>0.97</b>   | <b>0.20</b>   | <b>0.08</b>   | <b>1.08</b>   | <b>0.59</b>   |
| <b>1391</b>            | <b>1390</b>       | <b><i>trans</i>-<math>\beta</math>-Elemene</b> | <b>0.00</b>   | <b>0.08</b>   | <b>5.28</b>   | <b>0.02</b>   | <b>0.01</b>   | <b>0.10</b>   | <b>0.03</b>   |
| 1394                   | 1394              | Sativene                                       | 0.00          | 0.02          | 0.01          | 0.00          | 0.00          | 0.00          | 0.00          |
| 1406                   | 1405              | ( <i>Z</i> )-Caryophyllene                     | 0.05          | 0.01          | 0.01          | 0.02          | 0.01          | 0.00          | 0.00          |
| <b>1423</b>            | <b>1424</b>       | <b>(<i>E</i>)-Caryophyllene</b>                | <b>14.17</b>  | <b>29.84</b>  | <b>19.91</b>  | <b>14.29</b>  | <b>4.14</b>   | <b>14.80</b>  | <b>5.97</b>   |
| 1423                   | 1428              | $\beta$ -Duprezianene                          | 0.00          | 0.00          | 0.00          | 0.00          | 0.00          | 0.00          | 0.01          |
| 1430                   | 1432              | $\gamma$ -Elemene                              | 0.00          | 0.00          | 0.00          | 0.00          | 0.00          | 0.00          | 0.00          |
| <b>1431</b>            | <b>1433</b>       | <b><math>\beta</math>-Copaene</b>              | <b>0.84</b>   | <b>5.32</b>   | <b>2.14</b>   | <b>0.31</b>   | <b>0.05</b>   | <b>0.99</b>   | <b>0.52</b>   |
| 1433                   | 1432              | <i>trans</i> - $\alpha$ -Bergamotene           | 0.00          | 0.00          | 0.00          | 0.00          | 0.00          | 0.00          | 0.00          |
| 1436                   | 1436              | $\alpha$ -Guaiene                              | 0.00          | 0.00          | 2.59          | 0.00          | 0.00          | 0.00          | 0.00          |

| RI <sub>cal</sub><br>c | RI <sub>lab</sub> | Compound                           | RE1904<br>01A | RE1904<br>01D | RE190<br>401E | LD190<br>910C | LD1909<br>10D | LD190<br>910E | LD190<br>910F |
|------------------------|-------------------|------------------------------------|---------------|---------------|---------------|---------------|---------------|---------------|---------------|
| 1439                   | 1442              | 6,9-Guaiadiene                     | 0.00          | 0.01          | 0.01          | 0.00          | 0.00          | 0.00          | 0.00          |
| 1440                   | 1439              | (Z)-β-Farnesene                    | 0.00          | 0.00          | 0.00          | 0.00          | 0.00          | 0.00          | 0.00          |
| 1444                   | 1445              | Selina-5,11-diene                  | 0.00          | 0.00          | 0.01          | 0.00          | 0.00          | 0.00          | 0.00          |
| 1445                   | 1447              | iso-Germacrene D                   | 0.00          | 0.00          | 0.01          | 0.00          | 0.00          | 0.00          | 0.00          |
| 1446                   | 1446              | cis-Muurola-3,5-diene              | 0.00          | 0.05          | 0.01          | 0.00          | 0.00          | 0.00          | 0.00          |
| 1450                   | 1452              | trans-Muurola-3,5-diene            | 0.02          | 0.33          | 0.07          | 0.00          | 0.00          | 0.02          | 0.01          |
| 1451                   | 1452              | (E)-β-Farnesene                    | 0.00          | 0.02          | 0.00          | 0.00          | 0.00          | 0.00          | 0.00          |
| 1452                   | 1453              | ε-Muurolene                        | 0.00          | 0.00          | 0.00          | 0.00          | 0.00          | 0.03          | 0.00          |
| 1452                   | 1455              | Sesquisabinene                     | 0.00          | 0.00          | 0.00          | 0.00          | 0.00          | 0.00          | 0.00          |
| 1453                   | 1455              | Valerena-4,7(11)-diene             | 0.00          | 0.00          | 0.00          | 0.00          | 0.00          | 0.00          | 0.00          |
| <b>1456</b>            | <b>1454</b>       | <b>α-Humulene</b>                  | <b>0.25</b>   | <b>0.68</b>   | <b>0.71</b>   | <b>0.27</b>   | <b>0.08</b>   | <b>0.34</b>   | <b>0.12</b>   |
| 1459                   | 1461              | cis-Cadina-1(6),4-diene            | 0.00          | 0.00          | 0.00          | 0.00          | 0.00          | 0.00          | 0.00          |
| 1461                   | 1464              | 9-epi-(E)-Caryophyllene            | 0.00          | 0.00          | 0.00          | 0.00          | 0.00          | 0.02          | 0.00          |
| 1463                   | 1463              | cis-Muurola-4(14),5-diene          | 0.00          | 0.08          | 0.02          | 0.00          | 0.00          | 0.04          | 0.00          |
| 1470                   | 1471              | 4,5-di-epi-Aristolochene           | 0.00          | 0.00          | 0.01          | 0.00          | 0.00          | 0.00          | 0.00          |
| 1472                   | 1472              | trans-Cadina-1(6),4-diene          | 0.01          | 0.33          | 0.05          | 0.01          | 0.00          | 0.02          | 0.00          |
| 1473                   | 1475              | Selina-4,11-diene                  | 0.00          | 0.00          | 0.12          | 0.00          | 0.00          | 0.00          | 0.00          |
| <b>1475</b>            | <b>1478</b>       | <b>γ-Muurolene</b>                 | <b>0.27</b>   | <b>1.72</b>   | <b>0.67</b>   | <b>0.09</b>   | <b>0.02</b>   | <b>0.35</b>   | <b>0.15</b>   |
| 1478                   | 1480              | cis-4,10-Epoxyamorphane            | 0.21          | 0.72          | 0.18          | 0.03          | 0.01          | 0.10          | 0.05          |
| 1478                   | 1483              | α-Amorphene                        | 0.00          | 0.00          | 0.04          | 0.00          | 0.00          | 0.00          | 0.00          |
| <b>1482</b>            | <b>1480</b>       | <b>Germacrene D</b>                | <b>0.01</b>   | <b>0.47</b>   | <b>0.68</b>   | <b>0.12</b>   | <b>0.42</b>   | <b>5.31</b>   | <b>1.08</b>   |
| 1487                   | 1488              | δ-Selinene                         | 0.00          | 0.00          | 0.00          | 0.00          | 0.00          | 0.00          | 0.00          |
| 1488                   | 1491              | Eremophilene                       | 0.00          | 0.00          | 0.02          | 0.00          | 0.00          | 0.00          | 0.00          |
| 1490                   | 1487              | β-Selinene                         | 0.00          | 0.04          | 0.68          | 0.00          | 0.00          | 0.00          | 0.00          |
| 1493                   | 1490              | γ-Amorphene                        | 0.03          | 0.53          | 0.11          | 0.01          | 0.00          | 0.08          | 0.02          |
| 1496                   | 1497              | α-Selinene                         | 0.00          | 0.00          | 0.74          | 0.00          | 0.00          | 0.00          | 0.00          |
| 1496                   | 1498              | epi-Cubebol                        | 0.16          | 0.60          | 0.00          | 0.04          | 0.02          | 0.14          | 0.04          |
| 1497                   | 1498              | Bicyclogermacrene                  | 0.00          | 0.00          | 0.00          | 0.00          | 0.00          | 0.00          | 0.00          |
| <b>1499</b>            | <b>1497</b>       | <b>α-Muurolene</b>                 | <b>0.33</b>   | <b>2.13</b>   | <b>0.81</b>   | <b>0.11</b>   | <b>0.02</b>   | <b>0.39</b>   | <b>0.18</b>   |
| 1502                   | 1497              | Valencene                          | 0.00          | 0.00          | 0.00          | 0.00          | 0.00          | 0.00          | 0.00          |
| 1502                   | 1504              | iso-Daucene                        | 0.00          | 0.09          | 0.00          | 0.05          | 0.00          | 0.04          | 0.00          |
| 1503                   | 1503              | (E,E)-α-Farnesene                  | 0.00          | 0.00          | 0.00          | 0.00          | 0.00          | 0.02          | 0.03          |
| 1503                   | 1506              | δ-Amorphene                        | 0.00          | 0.07          | 0.00          | 0.00          | 0.00          | 0.00          | 0.00          |
| 1505                   | 1505              | α-Bulnesene                        | 0.00          | 0.00          | 2.25          | 0.00          | 0.00          | 0.00          | 0.00          |
| 1508                   | 1508              | β-Bisabolene                       | 0.00          | 0.00          | 0.00          | 0.00          | 0.00          | 0.00          | 0.00          |
| 1509                   | 1511              | Germacrene A                       | 0.00          | 0.00          | 0.00          | 0.00          | 0.00          | 0.00          | 0.00          |
| 1514                   | 1512              | γ-Cadinene                         | 0.00          | 0.00          | 0.00          | 0.00          | 0.00          | 0.04          | 0.00          |
| <b>1516</b>            | <b>1519</b>       | <b>Cubebol</b>                     | <b>0.71</b>   | <b>1.00</b>   | <b>0.41</b>   | <b>0.08</b>   | <b>0.02</b>   | <b>0.25</b>   | <b>0.14</b>   |
| <b>1518</b>            | <b>1518</b>       | <b>δ-Cadinene</b>                  | <b>0.15</b>   | <b>1.88</b>   | <b>0.50</b>   | <b>0.08</b>   | <b>0.08</b>   | <b>0.42</b>   | <b>0.10</b>   |
| 1521                   | 1519              | trans-Calamenene                   | 0.03          | 0.00          | 0.00          | 0.00          | 0.00          | 0.00          | 0.00          |
| 1523                   | 1521              | Zonarene                           | 0.01          | 0.19          | 0.05          | 0.00          | 0.00          | 0.00          | 0.00          |
| 1525                   | 1524              | β-Sesquiphellandrene               | 0.00          | 0.00          | 0.00          | 0.00          | 0.00          | 0.00          | 0.00          |
| 1533                   | 1536              | trans-Cadina-1,4-diene             | 0.02          | 0.25          | 0.05          | 0.00          | 0.00          | 0.00          | 0.01          |
| 1537                   | 1538              | α-Cadinene                         | 0.00          | 0.00          | 0.00          | 0.00          | 0.00          | 0.00          | 0.00          |
| 1541                   | 1541              | α-Calacorene                       | 0.00          | 0.00          | 0.00          | 0.00          | 0.00          | 0.00          | 0.00          |
| 1548                   | 1546              | α-Elemol                           | 0.00          | 0.00          | 0.00          | 0.00          | 0.00          | 0.00          | 0.01          |
| 1559                   | 1557              | Germacrene B                       | 0.00          | 0.05          | 0.15          | 0.00          | 0.00          | 0.00          | 0.00          |
| 1570                   | 1566              | 1,5-Epoxyalsvial-4(14)ene          | 0.00          | 0.00          | 0.00          | 0.00          | 0.00          | 0.00          | 0.00          |
| 1577                   | 1576              | Spathulenol                        | 0.00          | 0.00          | 0.00          | 0.00          | 0.02          | 0.00          | 0.00          |
| 1578                   | 1575              | Germacra-1(10),5-dien-4β-ol        | 0.00          | 0.00          | 0.00          | 0.00          | 0.00          | 0.00          | 0.01          |
| <b>1584</b>            | <b>1587</b>       | <b>Caryophyllene oxide</b>         | <b>2.50</b>   | <b>0.49</b>   | <b>0.74</b>   | <b>0.57</b>   | <b>0.46</b>   | <b>0.68</b>   | <b>0.15</b>   |
| 1596                   | 1596              | Salvial-4(14)-en-1-one             | 0.00          | 0.00          | 0.00          | 0.00          | 0.01          | 0.00          | 0.00          |
| 1600                   | 1600              | Hexadecane                         | 0.00          | 0.00          | 0.00          | 0.00          | 0.00          | 0.00          | 0.00          |
| 1615                   | 1613              | Humulene epoxide II                | 0.10          | 0.00          | 0.00          | 0.00          | 0.01          | 0.00          | 0.00          |
| 1628                   | 1623              | Humulane-1,6-dien-3-ol             | 0.00          | 0.00          | 0.00          | 0.00          | 0.04          | 0.20          | 0.02          |
| 1628                   | 1627              | Germacra-1(10),5-dien-4α-ol        | 0.00          | 0.04          | 0.02          | 0.00          | 0.00          | 0.00          | 0.00          |
| 1634                   | 1631              | 1-epi-Cubenol                      | 0.00          | 0.17          | 0.09          | 0.00          | 0.00          | 0.00          | 0.00          |
| 1634                   | ---               | Unidentified                       | 0.30          | 0.49          | 0.24          | 0.04          | 0.01          | 0.00          | 0.00          |
| 1635                   | 1629              | iso-Spathulenol                    | 0.00          | 0.00          | 0.00          | 0.00          | 0.00          | 0.00          | 0.00          |
| 1640                   | 1633              | γ-Eudesmol                         | 0.00          | 0.00          | 0.00          | 0.00          | 0.00          | 0.00          | 0.00          |
| 1640                   | 1642              | Caryophylla-4(12),8(13)-dien-5α-ol | 0.06          | 0.00          | 0.00          | 0.00          | 0.00          | 0.00          | 0.00          |

| RI <sub>calc</sub> | RI <sub>db</sub> | Compound                                             | RE1904<br>01A | RE1904<br>01D | RE190<br>401E | LD190<br>910C | LD1909<br>10D | LD190<br>910E | LD190<br>910F |
|--------------------|------------------|------------------------------------------------------|---------------|---------------|---------------|---------------|---------------|---------------|---------------|
| 1641               | 1644             | Caryophylla-4(12),8(13)-dien-5β-ol                   | 0.00          | 0.00          | 0.00          | 0.00          | 0.00          | 0.00          | 0.00          |
| 1642               | 1638             | (2S,5E)-Caryophyll-5-en-12-al                        | 0.05          | 0.00          | 0.00          | 0.00          | 0.00          | 0.00          | 0.00          |
| 1647               | 1643             | Cubanol                                              | 0.00          | 0.18          | 0.06          | 0.00          | 0.00          | 0.00          | 0.00          |
| <b>1650</b>        | <b>1651</b>      | <b>α-Muurolol</b>                                    | <b>2.01</b>   | <b>2.92</b>   | <b>1.65</b>   | <b>0.27</b>   | <b>0.06</b>   | <b>0.74</b>   | <b>0.41</b>   |
| 1658               | 1655             | α-Eudesmol                                           | 0.00          | 0.00          | 0.00          | 0.00          | 0.00          | 0.00          | 0.00          |
| 1658               | 1655             | α-Cadinol                                            | 0.00          | 0.00          | 0.00          | 0.00          | 0.00          | 0.00          | 0.00          |
| 1658               | 1656             | β-Eudesmol                                           | 0.03          | 0.00          | 0.03          | 0.00          | 0.00          | 0.00          | 0.00          |
| 1660               | 1660             | Selin-11-en-4α-ol                                    | 0.04          | 0.00          | 1.67          | 0.00          | 0.00          | 0.00          | 0.00          |
| 1671               | 1666             | 14-Hydroxy-9- <i>epi</i> -( <i>E</i> )-caryophyllene | 0.74          | 0.00          | 0.00          | 0.00          | 0.00          | 0.00          | 0.00          |
| 1681               | 1676             | Bornyl 8-hydroxyisobutanoate                         | 0.00          | 0.00          | 0.00          | 0.00          | 0.00          | 0.00          | 0.00          |
| 2052               | 2050             | Bornyl hydrocinnamate                                | 0.00          | 0.00          | 0.02          | 0.00          | 0.02          | 0.00          | 0.00          |
| 2151               | 2152             | 3-Phenylpropyl 3-phenylpropanoate                    | 0.00          | 0.00          | 0.02          | 0.00          | 0.00          | 0.00          | 0.00          |
| <b>2224</b>        | <b>2223</b>      | <b>Bornyl cinnamate</b>                              | <b>0.35</b>   | <b>0.14</b>   | <b>0.27</b>   | <b>0.36</b>   | <b>0.45</b>   | <b>0.44</b>   | <b>0.54</b>   |
| 2318               | 2321             | 3-Phenylpropyl cinnamate                             | 0.00          | 0.04          | 0.00          | 0.00          | 0.00          | 0.00          | 0.00          |
| 2434               | 2432             | Phenylallyl cinnamate                                | 0.00          | 0.03          | 0.00          | 0.00          | 0.00          | 0.02          | 0.00          |
|                    |                  | Monoterpene hydrocarbons                             | 64.79         | 38.75         | 48.68         | 76.52         | 86.95         | 69.89         | 85.89         |
|                    |                  | Oxygenated monoterpeneoids                           | 9.87          | 3.57          | 5.37          | 5.29          | 6.41          | 2.15          | 3.50          |
|                    |                  | Sesquiterpene hydrocarbons                           | 17.08         | 48.86         | 40.05         | 15.69         | 5.13          | 24.91         | 9.02          |
|                    |                  | Oxygenated sesquiterpeneoids                         | 6.60          | 6.11          | 4.86          | 0.99          | 0.65          | 2.10          | 0.83          |
|                    |                  | Benzenoid aromatics                                  | 0.78          | 2.13          | 0.69          | 1.34          | 0.77          | 0.72          | 0.62          |
|                    |                  | Others                                               | 0.00          | 0.00          | 0.00          | 0.00          | 0.00          | 0.00          | 0.00          |
|                    |                  | Total identified                                     | 99.12         | 99.43         | 99.65         | 99.84         | 99.91         | 99.78         | 99.86         |

RI<sub>calc</sub>: Retention indices determined with respect to a homologous series of *n*-alkanes on a ZB-5ms column. RI<sub>db</sub>: Retention indices from the databases. Compounds in **boldface** were used in the multivariate (HCA and PCA) analyses.

Table S1. Continued.

| RI <sub>calc</sub> | RI <sub>db</sub> | Compound                                 | LD1909<br>10G | LD1909<br>10H | LD190<br>910I | LD190<br>910J | LD190<br>910K | LD190<br>910L | LD1909<br>10M |
|--------------------|------------------|------------------------------------------|---------------|---------------|---------------|---------------|---------------|---------------|---------------|
| 763                | 763              | Toluene                                  | 0.00          | 0.00          | 0.00          | 0.00          | 0.00          | 0.00          | 0.00          |
| 863                | 857              | Ethylbenzene                             | 0.00          | 0.00          | 0.00          | 0.00          | 0.00          | 0.00          | 0.05          |
| 893                | 891              | Styrene                                  | 0.00          | 0.00          | 0.00          | 0.06          | 0.00          | 0.00          | 0.03          |
| 900                | 893              | 2-Bornene                                | 0.00          | 0.00          | 0.00          | 0.00          | 0.00          | 0.00          | 0.00          |
| 908                | 910              | ( <i>E</i> )-2,6-Dimethyl-4-octene       | 0.00          | 0.00          | 0.00          | 0.00          | 0.00          | 0.00          | 0.00          |
| 920                | 919              | 5,5-Dimethyl-1-vinylbicyclo[2.1.1]hexane | 0.00          | 0.00          | 0.00          | 0.00          | 0.00          | 0.00          | 0.01          |
| 923                | 922              | Tricyclene                               | 0.30          | 0.23          | 0.34          | 0.27          | 0.42          | 0.30          | 0.20          |
| 929                | 927              | α-Thujene                                | 0.41          | 0.33          | 0.45          | 0.44          | 0.53          | 0.42          | 0.24          |
| <b>938</b>         | <b>933</b>       | <b>α-Pinene</b>                          | <b>27.28</b>  | <b>22.70</b>  | <b>27.80</b>  | <b>25.35</b>  | <b>30.06</b>  | <b>23.74</b>  | <b>21.18</b>  |
| 945                | 948              | β-Citronellene                           | 0.00          | 0.00          | 0.00          | 0.00          | 0.00          | 0.00          | 0.02          |
| 948                | 947              | Allylbenzene                             | 0.00          | 0.00          | 0.01          | 0.32          | 0.01          | 0.09          | 0.47          |
| 951                | 948              | α-Fenchene                               | 0.00          | 0.00          | 0.00          | 0.00          | 0.00          | 0.00          | 0.00          |
| <b>953</b>         | <b>953</b>       | <b>Camphene</b>                          | <b>11.90</b>  | <b>9.29</b>   | <b>13.70</b>  | <b>10.93</b>  | <b>17.32</b>  | <b>13.62</b>  | <b>9.18</b>   |
| 956                | 953              | Thuja-2,4(10)-diene                      | 0.01          | 0.01          | 0.01          | 0.02          | 0.02          | 0.03          | 0.00          |
| 964                | 964              | Benzaldehyde                             | 0.00          | 0.00          | 0.00          | 0.00          | 0.00          | 0.00          | 0.00          |
| 966                | 964              | ( <i>Z</i> )-3,7-Dimethyl-2-octene       | 0.01          | 0.00          | 0.00          | 0.09          | 0.01          | 0.12          | 2.27          |
| <b>973</b>         | <b>972</b>       | <b>Sabinene</b>                          | <b>2.33</b>   | <b>1.95</b>   | <b>3.11</b>   | <b>1.34</b>   | <b>3.58</b>   | <b>1.64</b>   | <b>0.38</b>   |
| <b>979</b>         | <b>978</b>       | <b>β-Pinene</b>                          | <b>19.12</b>  | <b>18.67</b>  | <b>20.75</b>  | <b>17.17</b>  | <b>22.68</b>  | <b>18.67</b>  | <b>12.03</b>  |
| 982                | 988              | α-Methylstyrene                          | 0.00          | 0.00          | 0.00          | 0.00          | 0.00          | 0.00          | 0.00          |
| <b>987</b>         | <b>991</b>       | <b>Myrcene</b>                           | <b>1.44</b>   | <b>1.33</b>   | <b>1.64</b>   | <b>0.23</b>   | <b>1.89</b>   | <b>0.04</b>   | <b>0.11</b>   |
| 989                | 990              | 2,3-Dehydro-1,8-cineole                  | 0.00          | 0.00          | 0.00          | 0.00          | 0.00          | 0.00          | 0.00          |
| 991                | 990              | <i>o</i> -Methylstyrene                  | 0.00          | 0.00          | 0.00          | 0.00          | 0.00          | 0.00          | 0.00          |
| 999                | 997              | <i>p</i> -Menth-2-ene                    | 0.00          | 0.00          | 0.00          | 0.12          | 0.02          | 0.84          | 2.88          |

| RI <sub>cal</sub><br>c | RI <sub>db</sub> | Compound                                                | LD1909<br>10G | LD1909<br>10H | LD190<br>910I | LD190<br>910J | LD190<br>910K | LD190<br>910L | LD1909<br>10M |
|------------------------|------------------|---------------------------------------------------------|---------------|---------------|---------------|---------------|---------------|---------------|---------------|
| 1002                   | 1004             | <i>p</i> -Menth-1(7),8-diene                            | 0.00          | 0.00          | 0.00          | 0.00          | 0.00          | 0.01          | 0.00          |
| 1005                   | 1007             | $\alpha$ -Phellandrene                                  | 0.03          | 0.02          | 0.02          | 0.03          | 0.06          | 0.02          | 0.10          |
| 1007                   | 1008             | $\delta$ -3-Carene                                      | 0.01          | 0.01          | 0.02          | 0.01          | 0.02          | 0.01          | 0.02          |
| 1015                   | 1018             | $\alpha$ -Terpinene                                     | 0.03          | 0.02          | 0.02          | 0.12          | 0.07          | 0.16          | 0.43          |
| <b>1021</b>            | <b>1022</b>      | <b>(2<i>E</i>,4<i>E</i>)-3,7-Dimethylocta-2,4-diene</b> | <b>0.32</b>   | <b>0.18</b>   | <b>0.34</b>   | <b>0.51</b>   | <b>0.17</b>   | <b>0.29</b>   | <b>3.91</b>   |
| <b>1023</b>            | <b>1025</b>      | <b><i>p</i>-Cymene</b>                                  | <b>0.05</b>   | <b>0.05</b>   | <b>0.08</b>   | <b>1.45</b>   | <b>0.36</b>   | <b>2.81</b>   | <b>7.83</b>   |
| 1026                   | 1028             | Indane                                                  | 0.00          | 0.00          | 0.00          | 0.00          | 0.00          | 0.14          | 0.11          |
| <b>1028</b>            | <b>1030</b>      | <b>Limonene</b>                                         | <b>6.45</b>   | <b>4.52</b>   | <b>6.13</b>   | <b>4.53</b>   | <b>7.30</b>   | <b>6.12</b>   | <b>3.87</b>   |
| 1030                   | 1031             | $\beta$ -Phellandrene                                   | 0.26          | 0.24          | 0.24          | 0.09          | 0.23          | 0.00          | 0.05          |
| 1031                   | 1032             | 1,8-Cineole                                             | 0.12          | 0.08          | 0.10          | 0.12          | 0.13          | 0.20          | 0.06          |
| 1034                   | 1034             | ( <i>Z</i> )- $\beta$ -Ocimene                          | 0.03          | 0.02          | 0.03          | 0.01          | 0.03          | 0.02          | 0.01          |
| 1044                   | 1046             | ( <i>E</i> )- $\beta$ -Ocimene                          | 0.04          | 0.04          | 0.04          | 0.01          | 0.04          | 0.00          | 0.01          |
| 1057                   | 1058             | $\gamma$ -Terpinene                                     | 0.06          | 0.04          | 0.04          | 0.48          | 0.07          | 0.48          | 0.45          |
| 1060                   | 1064             | Benzenemethanol                                         | 0.00          | 0.00          | 0.00          | 0.00          | 0.00          | 0.00          | 0.00          |
| 1066                   | 1068             | Acetophenone                                            | 0.03          | 0.00          | 0.03          | 0.06          | 0.00          | 0.04          | 0.01          |
| 1069                   | 1069             | <i>cis</i> -Sabinene hydrate                            | 0.09          | 0.05          | 0.05          | 0.04          | 0.05          | 0.06          | 0.05          |
| 1085                   | 1086             | Terpinolene                                             | 0.16          | 0.11          | 0.11          | 0.10          | 0.28          | 0.18          | 0.46          |
| 1089                   | 1090             | Fenchone                                                | 0.00          | 0.00          | 0.00          | 0.01          | 0.00          | 0.02          | 0.01          |
| 1091                   | 1093             | <i>p</i> -Cymenene                                      | 0.00          | 0.00          | 0.00          | 0.00          | 0.00          | 0.00          | 0.00          |
| 1099                   | 1098             | Perillene                                               | 0.00          | 0.00          | 0.00          | 0.00          | 0.00          | 0.00          | 0.01          |
| 1099                   | 1101             | $\alpha$ -Pinene oxide                                  | 0.00          | 0.03          | 0.03          | 0.00          | 0.03          | 0.00          | 0.00          |
| 1100                   | 1101             | Linalool                                                | 0.04          | 0.01          | 0.05          | 0.01          | 0.03          | 0.06          | 0.02          |
| 1101                   | 1101             | <i>trans</i> -Sabinene hydrate                          | 0.02          | 0.01          | 0.01          | 0.01          | 0.02          | 0.01          | 0.01          |
| 1121                   | 1121             | <i>exo</i> -Fenchol (= $\beta$ -Fenchol)                | 0.00          | 0.00          | 0.00          | 0.01          | 0.00          | 0.02          | 0.01          |
| 1123                   | 1122             | Chrystanthenone                                         | 0.00          | 0.00          | 0.00          | 0.00          | 0.00          | 0.00          | 0.00          |
| 1123                   | 1122             | <i>trans-p</i> -Mentha-2,8-dien-1-ol                    | 0.00          | 0.00          | 0.00          | 0.00          | 0.01          | 0.01          | 0.00          |
| 1125                   | 1224             | <i>p</i> -Menth-1-en-9-al                               | 0.00          | 0.00          | 0.00          | 0.00          | 0.00          | 0.00          | 0.00          |
| 1126                   | 1124             | <i>cis-p</i> -Menth-2-en-1-ol                           | 0.00          | 0.00          | 0.00          | 0.01          | 0.00          | 0.02          | 0.01          |
| 1128                   | 1127             | $\alpha$ -Campholenal                                   | 0.00          | 0.00          | 0.00          | 0.00          | 0.01          | 0.00          | 0.00          |
| 1134                   | 1134             | <i>cis</i> -Limonene oxide                              | 0.00          | 0.00          | 0.00          | 0.00          | 0.01          | 0.00          | 0.00          |
| 1143                   | 1141             | <i>trans</i> -Pinocarveol                               | 0.02          | 0.03          | 0.03          | 0.01          | 0.04          | 0.02          | 0.00          |
| 1144                   | 1141             | <i>cis</i> -Verbenol                                    | 0.00          | 0.00          | 0.00          | 0.00          | 0.00          | 0.04          | 0.00          |
| 1145                   | 1142             | <i>trans-p</i> -Menth-2-en-1-ol                         | 0.00          | 0.00          | 0.00          | 0.01          | 0.00          | 0.00          | 0.01          |
| 1145                   | 1143             | <i>trans</i> -Dihydro- $\beta$ -terpineol               | 0.00          | 0.00          | 0.00          | 0.00          | 0.00          | 0.00          | 0.01          |
| 1148                   | 1146             | <i>trans</i> -Verbenol                                  | 0.01          | 0.02          | 0.02          | 0.02          | 0.03          | 0.08          | 0.00          |
| <b>1150</b>            | <b>1149</b>      | <b>Camphor</b>                                          | <b>0.35</b>   | <b>0.26</b>   | <b>0.25</b>   | <b>2.59</b>   | <b>0.54</b>   | <b>4.69</b>   | <b>6.17</b>   |
| 1151                   | 1149             | <i>trans</i> -Dihydro- $\alpha$ -terpineol              | 0.00          | 0.00          | 0.00          | 0.00          | 0.00          | 0.31          | 0.00          |
| 1152                   | 1150             | $\alpha$ -Phellandren-8-ol                              | 0.00          | 0.00          | 0.00          | 0.01          | 0.00          | 0.00          | 0.01          |
| 1158                   | 1156             | Camphene hydrate                                        | 0.00          | 0.00          | 0.00          | 0.01          | 0.00          | 0.03          | 0.02          |
| 1159                   | 1157             | Sabina ketone                                           | 0.00          | 0.00          | 0.00          | 0.00          | 0.00          | 0.01          | 0.00          |
| 1160                   | 1158             | Menthone                                                | 0.00          | 0.00          | 0.00          | 0.00          | 0.00          | 0.00          | 0.03          |
| 1163                   | 1160             | <i>trans</i> -Pinocamphone                              | 0.00          | 0.00          | 0.00          | 0.02          | 0.01          | 0.02          | 0.03          |
| 1165                   | 1164             | Pinocarvone                                             | 0.01          | 0.02          | 0.02          | 0.04          | 0.02          | 0.03          | 0.00          |
| 1167                   | 1164             | <i>cis</i> -Dihydro- $\alpha$ -terpineol                | 0.00          | 0.00          | 0.00          | 0.00          | 0.00          | 0.01          | 0.00          |
| 1167                   | 1165             | Isoborneol                                              | 0.00          | 0.00          | 0.00          | 0.00          | 0.00          | 0.02          | 0.03          |
| 1170                   | 1171             | 4-Ethylphenol                                           | 0.00          | 0.00          | 0.00          | 0.00          | 0.00          | 0.00          | 0.00          |
| <b>1175</b>            | <b>1173</b>      | <b>Borneol</b>                                          | <b>0.34</b>   | <b>0.49</b>   | <b>0.36</b>   | <b>0.33</b>   | <b>0.62</b>   | <b>0.71</b>   | <b>0.30</b>   |
| 1179                   | 1176             | <i>cis</i> -Pinocamphone                                | 0.01          | 0.01          | 0.01          | 0.01          | 0.02          | 0.03          | 0.02          |
| 1181                   | 1179             | <i>iso</i> -Menthol                                     | 0.00          | 0.00          | 0.00          | 0.00          | 0.00          | 0.00          | 0.00          |
| 1181                   | 1179             | 2-Isopropenyl-5-methyl-4-hexenal                        | 0.00          | 0.00          | 0.00          | 0.01          | 0.00          | 0.00          | 0.00          |
| 1184                   | 1180             | Terpinen-4-ol                                           | 0.12          | 0.09          | 0.05          | 0.27          | 0.10          | 0.59          | 0.71          |
| 1187                   | 1183             | Myrtanal                                                | 0.00          | 0.01          | 0.01          | 0.01          | 0.01          | 0.00          | 0.00          |
| 1190                   | 1187             | Cryptone                                                | 0.00          | 0.00          | 0.00          | 0.00          | 0.00          | 0.00          | 0.00          |
| 1190                   | 1189             | <i>p</i> -Cymen-8-ol                                    | 0.00          | 0.01          | 0.01          | 0.01          | 0.01          | 0.01          | 0.00          |
| 1198                   | 1202             | Myrtenol                                                | 0.00          | 0.00          | 0.00          | 0.05          | 0.00          | 0.00          | 0.00          |
| 1199                   | 1195             | $\alpha$ -Terpineol                                     | 0.17          | 0.18          | 0.30          | 0.11          | 0.24          | 0.56          | 0.24          |
| 1202                   | 1198             | ( <i>Z</i> )-Dihydrocarvone                             | 0.00          | 0.00          | 0.00          | 0.00          | 0.00          | 0.00          | 0.00          |
| 1202                   | 1201             | Estragole (= Methyl chavicol)                           | 0.03          | 0.01          | 0.02          | 0.06          | 0.03          | 0.10          | 0.00          |
| 1211                   | 1208             | Verbenone                                               | 0.01          | 0.01          | 0.02          | 0.05          | 0.02          | 0.12          | 0.02          |

| RI <sub>cal</sub><br>c | RI <sub>db</sub> | Compound                                  | LD1909<br>10G | LD1909<br>10H | LD190<br>910I | LD190<br>910J | LD190<br>910K | LD190<br>910L | LD1909<br>10M |
|------------------------|------------------|-------------------------------------------|---------------|---------------|---------------|---------------|---------------|---------------|---------------|
| 1234                   | 1235             | Hydrocinnamic alcohol (= Benzenepropanol) | 0.00          | 0.00          | 0.00          | 0.02          | 0.00          | 0.08          | 0.00          |
| 1235                   | 1232             | <i>cis</i> -Carveol                       | 0.00          | 0.00          | 0.00          | 0.00          | 0.00          | 0.03          | 0.00          |
| 1247                   | 1246             | Carvone                                   | 0.00          | 0.00          | 0.00          | 0.00          | 0.01          | 0.02          | 0.00          |
| 1250                   | 1246             | <i>trans</i> -Shisool                     | 0.00          | 0.00          | 0.00          | 0.00          | 0.00          | 0.01          | 0.00          |
| 1274                   | 1276             | 2,3-Pinane diol                           | 0.00          | 0.01          | 0.00          | 0.00          | 0.00          | 0.00          | 0.00          |
| 1278                   | 1273             | ( <i>E</i> )-Cinnamaldehyde               | 0.01          | 0.01          | 0.02          | 0.02          | 0.00          | 0.00          | 0.00          |
| 1280                   | 1278             | Perilla aldehyde                          | 0.00          | 0.00          | 0.00          | 0.00          | 0.00          | 0.00          | 0.00          |
| 1283                   | 1278             | <i>cis</i> -Verbenyl acetate              | 0.00          | 0.00          | 0.00          | 0.00          | 0.00          | 0.00          | 0.00          |
| <b>1286</b>            | <b>1285</b>      | <b>Bornyl acetate</b>                     | <b>1.45</b>   | <b>2.05</b>   | <b>0.68</b>   | <b>0.16</b>   | <b>3.87</b>   | <b>2.06</b>   | <b>0.69</b>   |
| 1287                   | 1287             | Isobornyl acetate                         | 0.00          | 0.00          | 0.00          | 0.00          | 0.01          | 0.02          | 0.00          |
| 1300                   | 1297             | <i>p</i> -Menth-1-en-9-ol                 | 0.00          | 0.00          | 0.00          | 0.00          | 0.00          | 0.00          | 0.00          |
| 1300                   | 1299             | Perilla alcohol                           | 0.00          | 0.00          | 0.01          | 0.00          | 0.00          | 0.00          | 0.00          |
| 1300                   | 1300             | Carvacrol                                 | 0.00          | 0.00          | 0.00          | 0.00          | 0.00          | 0.00          | 0.00          |
| 1309                   | 1309             | ( <i>E</i> )-Cinnamyl alcohol             | 0.00          | 0.00          | 0.00          | 0.00          | 0.00          | 0.00          | 0.00          |
| 1331                   | 1334             | Bicycloelemene                            | 0.01          | 0.01          | 0.01          | 0.00          | 0.00          | 0.00          | 0.08          |
| 1334                   | 1335             | δ-Elemene                                 | 0.00          | 0.00          | 0.00          | 0.00          | 0.01          | 0.00          | 0.00          |
| <b>1349</b>            | <b>1349</b>      | <b>α-Cubebene</b>                         | <b>0.05</b>   | <b>0.06</b>   | <b>0.08</b>   | <b>0.38</b>   | <b>0.02</b>   | <b>0.32</b>   | <b>0.18</b>   |
| 1352                   | 1352             | Ethyl hydrocinnamate                      | 0.00          | 0.00          | 0.00          | 0.00          | 0.00          | 0.00          | 0.00          |
| 1371                   | 1367             | Cyclosativene                             | 0.06          | 0.04          | 0.07          | 0.10          | 0.03          | 0.16          | 0.14          |
| 1377                   | 1375             | α-Copaene                                 | 0.39          | 0.63          | 0.60          | 0.06          | 0.27          | 0.12          | 0.10          |
| 1380                   | 1384             | Daucene                                   | 0.01          | 0.01          | 0.01          | 0.00          | 0.00          | 0.00          | 0.00          |
| 1383                   | 1383             | <i>cis</i> -β-Elemene                     | 0.01          | 0.01          | 0.01          | 0.00          | 0.04          | 0.00          | 0.00          |
| 1383                   | 1385             | Isopropyl 3-phenylpropanoate              | 0.00          | 0.00          | 0.00          | 0.00          | 0.00          | 0.01          | 0.00          |
| 1385                   | 1382             | β-Bourbonene                              | 0.04          | 0.05          | 0.05          | 0.00          | 0.03          | 0.02          | 0.02          |
| <b>1389</b>            | <b>1392</b>      | <b>β-Cubebene</b>                         | <b>0.76</b>   | <b>0.61</b>   | <b>0.82</b>   | <b>0.44</b>   | <b>0.32</b>   | <b>0.64</b>   | <b>0.57</b>   |
| <b>1391</b>            | <b>1390</b>      | <b><i>trans</i>-β-Elemene</b>             | <b>0.11</b>   | <b>0.23</b>   | <b>0.09</b>   | <b>0.03</b>   | <b>0.87</b>   | <b>0.02</b>   | <b>0.02</b>   |
| 1394                   | 1394             | Sativene                                  | 0.00          | 0.00          | 0.00          | 0.00          | 0.00          | 0.00          | 0.00          |
| 1406                   | 1405             | ( <i>Z</i> )-Caryophyllene                | 0.00          | 0.00          | 0.00          | 0.06          | 0.00          | 0.04          | 0.02          |
| <b>1423</b>            | <b>1424</b>      | <b>(<i>E</i>)-Caryophyllene</b>           | <b>14.74</b>  | <b>21.59</b>  | <b>11.41</b>  | <b>24.27</b>  | <b>3.27</b>   | <b>8.88</b>   | <b>18.50</b>  |
| 1423                   | 1428             | β-Duprezianene                            | 0.00          | 0.00          | 0.00          | 0.00          | 0.00          | 0.00          | 0.00          |
| 1430                   | 1432             | γ-Elemene                                 | 0.00          | 0.00          | 0.00          | 0.00          | 0.00          | 0.00          | 0.00          |
| <b>1431</b>            | <b>1433</b>      | <b>β-Copaene</b>                          | <b>0.62</b>   | <b>0.41</b>   | <b>0.60</b>   | <b>0.98</b>   | <b>0.22</b>   | <b>1.34</b>   | <b>1.09</b>   |
| 1433                   | 1432             | <i>trans</i> -α-Bergamotene               | 0.00          | 0.00          | 0.00          | 0.02          | 0.01          | 0.00          | 0.01          |
| 1436                   | 1436             | α-Guaiene                                 | 0.00          | 0.02          | 0.00          | 0.00          | 0.09          | 0.00          | 0.00          |
| 1439                   | 1442             | 6,9-Guaiadiene                            | 0.00          | 0.00          | 0.00          | 0.00          | 0.00          | 0.00          | 0.00          |
| 1440                   | 1439             | ( <i>Z</i> )-β-Farnesene                  | 0.02          | 0.00          | 0.00          | 0.00          | 0.00          | 0.00          | 0.00          |
| 1444                   | 1445             | Selina-5,11-diene                         | 0.00          | 0.00          | 0.00          | 0.00          | 0.00          | 0.00          | 0.00          |
| 1445                   | 1447             | <i>iso</i> -Germacrene D                  | 0.02          | 0.03          | 0.02          | 0.00          | 0.01          | 0.00          | 0.00          |
| 1446                   | 1446             | <i>cis</i> -Muurola-3,5-diene             | 0.00          | 0.01          | 0.01          | 0.00          | 0.00          | 0.01          | 0.00          |
| 1450                   | 1452             | <i>trans</i> -Muurola-3,5-diene           | 0.01          | 0.02          | 0.02          | 0.04          | 0.01          | 0.06          | 0.04          |
| 1451                   | 1452             | ( <i>E</i> )-β-Farnesene                  | 0.00          | 0.00          | 0.00          | 0.00          | 0.00          | 0.00          | 0.00          |
| 1452                   | 1453             | ε-Murolene                                | 0.03          | 0.03          | 0.02          | 0.00          | 0.01          | 0.00          | 0.00          |
| 1452                   | 1455             | Sesquisabinene                            | 0.01          | 0.00          | 0.00          | 0.00          | 0.00          | 0.00          | 0.00          |
| 1453                   | 1455             | Valerena-4,7(11)-diene                    | 0.00          | 0.00          | 0.00          | 0.00          | 0.00          | 0.01          | 0.00          |
| <b>1456</b>            | <b>1454</b>      | <b>α-Humulene</b>                         | <b>0.35</b>   | <b>0.53</b>   | <b>0.27</b>   | <b>0.54</b>   | <b>0.10</b>   | <b>0.20</b>   | <b>0.38</b>   |
| 1459                   | 1461             | <i>cis</i> -Cadina-1(6),4-diene           | 0.00          | 0.00          | 0.00          | 0.00          | 0.00          | 0.00          | 0.00          |
| 1461                   | 1464             | 9- <i>epi</i> -( <i>E</i> )-Caryophyllene | 0.01          | 0.02          | 0.01          | 0.00          | 0.01          | 0.00          | 0.01          |
| 1463                   | 1463             | <i>cis</i> -Muurola-4(14),5-diene         | 0.02          | 0.05          | 0.03          | 0.01          | 0.01          | 0.01          | 0.01          |
| 1470                   | 1471             | 4,5-di- <i>epi</i> -Aristolochene         | 0.00          | 0.00          | 0.00          | 0.00          | 0.00          | 0.00          | 0.00          |
| 1472                   | 1472             | <i>trans</i> -Cadina-1(6),4-diene         | 0.01          | 0.01          | 0.01          | 0.05          | 0.00          | 0.05          | 0.03          |
| 1473                   | 1475             | Selina-4,11-diene                         | 0.00          | 0.00          | 0.00          | 0.00          | 0.00          | 0.00          | 0.00          |
| <b>1475</b>            | <b>1478</b>      | <b>γ-Murolene</b>                         | <b>0.20</b>   | <b>0.16</b>   | <b>0.21</b>   | <b>0.33</b>   | <b>0.07</b>   | <b>0.49</b>   | <b>0.35</b>   |
| 1478                   | 1480             | <i>cis</i> -4,10-Epoxyamorphane           | 0.08          | 0.03          | 0.04          | 0.16          | 0.02          | 0.27          | 0.16          |
| 1478                   | 1483             | α-Amorphene                               | 0.00          | 0.00          | 0.00          | 0.00          | 0.00          | 0.00          | 0.00          |
| <b>1482</b>            | <b>1480</b>      | <b>Germacrene D</b>                       | <b>6.46</b>   | <b>7.75</b>   | <b>5.07</b>   | <b>0.04</b>   | <b>1.76</b>   | <b>0.12</b>   | <b>0.13</b>   |
| 1487                   | 1488             | δ-Selinene                                | 0.00          | 0.00          | 0.00          | 0.00          | 0.00          | 0.00          | 0.00          |
| 1488                   | 1491             | Eremophilene                              | 0.00          | 0.00          | 0.00          | 0.00          | 0.00          | 0.00          | 0.00          |
| 1490                   | 1487             | β-Selinene                                | 0.00          | 0.01          | 0.00          | 0.01          | 0.02          | 0.01          | 0.00          |
| 1493                   | 1490             | γ-Amorphene                               | 0.04          | 0.08          | 0.06          | 0.06          | 0.02          | 0.10          | 0.06          |
| 1496                   | 1497             | α-Selinene                                | 0.00          | 0.00          | 0.00          | 0.00          | 0.00          | 0.00          | 0.00          |
| 1496                   | 1498             | <i>epi</i> -Cubebol                       | 0.00          | 0.00          | 0.00          | 0.09          | 0.00          | 0.19          | 0.09          |
| 1497                   | 1498             | Bicyclgermacrene                          | 0.13          | 0.16          | 0.12          | 0.00          | 0.05          | 0.00          | 0.00          |

| RI <sub>cal</sub><br>c | RI <sub>db</sub> | Compound                                                 | LD1909<br>10G | LD1909<br>10H | LD190<br>910I | LD190<br>910J | LD190<br>910K | LD190<br>910L | LD1909<br>10M |
|------------------------|------------------|----------------------------------------------------------|---------------|---------------|---------------|---------------|---------------|---------------|---------------|
| <b>1499</b>            | <b>1497</b>      | <b><math>\alpha</math>-Muurolene</b>                     | <b>0.24</b>   | <b>0.18</b>   | <b>0.24</b>   | <b>0.42</b>   | <b>0.08</b>   | <b>0.64</b>   | <b>0.43</b>   |
| 1502                   | 1497             | Valencene                                                | 0.00          | 0.00          | 0.00          | 0.00          | 0.00          | 0.00          | 0.00          |
| 1502                   | 1504             | <i>iso</i> -Daucene                                      | 0.00          | 0.00          | 0.00          | 0.10          | 0.00          | 0.00          | 0.00          |
| 1503                   | 1503             | ( <i>E,E</i> )- $\alpha$ -Farnesene                      | 0.03          | 0.11          | 0.06          | 0.00          | 0.00          | 0.00          | 0.00          |
| 1503                   | 1506             | $\delta$ -Amorphene                                      | 0.00          | 0.00          | 0.00          | 0.00          | 0.00          | 0.01          | 0.00          |
| 1505                   | 1505             | $\alpha$ -Bulnesene                                      | 0.00          | 0.00          | 0.00          | 0.00          | 0.08          | 0.00          | 0.00          |
| 1508                   | 1508             | $\beta$ -Bisabolene                                      | 0.07          | 0.00          | 0.00          | 0.01          | 0.00          | 0.00          | 0.00          |
| 1509                   | 1511             | Germacrene A                                             | 0.00          | 0.00          | 0.00          | 0.00          | 0.01          | 0.00          | 0.00          |
| 1514                   | 1512             | $\gamma$ -Cadinene                                       | 0.03          | 0.05          | 0.03          | 0.00          | 0.01          | 0.01          | 0.01          |
| <b>1516</b>            | <b>1519</b>      | <b>Cubebol</b>                                           | <b>0.22</b>   | <b>0.32</b>   | <b>0.22</b>   | <b>0.15</b>   | <b>0.07</b>   | <b>0.40</b>   | <b>0.24</b>   |
| <b>1518</b>            | <b>1518</b>      | <b><math>\delta</math>-Cadinene</b>                      | <b>0.27</b>   | <b>0.43</b>   | <b>0.36</b>   | <b>0.31</b>   | <b>0.14</b>   | <b>0.48</b>   | <b>0.31</b>   |
| 1521                   | 1519             | <i>trans</i> -Calamenene                                 | 0.00          | 0.00          | 0.00          | 0.00          | 0.00          | 0.02          | 0.00          |
| 1523                   | 1521             | Zonarene                                                 | 0.00          | 0.02          | 0.01          | 0.04          | 0.00          | 0.06          | 0.03          |
| 1525                   | 1524             | $\beta$ -Sesquiphellandrene                              | 0.03          | 0.00          | 0.00          | 0.00          | 0.00          | 0.00          | 0.00          |
| 1533                   | 1536             | <i>trans</i> -Cadina-1,4-diene                           | 0.02          | 0.03          | 0.02          | 0.04          | 0.01          | 0.06          | 0.03          |
| 1537                   | 1538             | $\alpha$ -Cadinene                                       | 0.01          | 0.03          | 0.02          | 0.00          | 0.01          | 0.00          | 0.00          |
| 1541                   | 1541             | $\alpha$ -Calacorene                                     | 0.00          | 0.00          | 0.00          | 0.00          | 0.00          | 0.00          | 0.00          |
| 1548                   | 1546             | $\alpha$ -Elemol                                         | 0.03          | 0.03          | 0.02          | 0.01          | 0.01          | 0.01          | 0.00          |
| 1559                   | 1557             | Germacrene B                                             | 0.00          | 0.01          | 0.01          | 0.01          | 0.01          | 0.02          | 0.01          |
| 1570                   | 1566             | 1,5-Epoxysalvia-4(14)ene                                 | 0.01          | 0.02          | 0.02          | 0.00          | 0.01          | 0.01          | 0.00          |
| 1577                   | 1576             | Spathulenol                                              | 0.00          | 0.00          | 0.00          | 0.00          | 0.00          | 0.01          | 0.00          |
| 1578                   | 1575             | Germacra-1(10),5-dien-4 $\beta$ -<br>ol                  | 0.12          | 0.17          | 0.11          | 0.04          | 0.00          | 0.01          | 0.03          |
| <b>1584</b>            | <b>1587</b>      | <b>Caryophyllene oxide</b>                               | <b>0.42</b>   | <b>1.21</b>   | <b>0.50</b>   | <b>1.15</b>   | <b>0.15</b>   | <b>0.90</b>   | <b>0.33</b>   |
| 1596                   | 1596             | Salvia-4(14)-en-1-one                                    | 0.00          | 0.03          | 0.02          | 0.00          | 0.01          | 0.01          | 0.00          |
| 1600                   | 1600             | Hexadecane                                               | 0.00          | 0.00          | 0.00          | 0.00          | 0.00          | 0.02          | 0.00          |
| 1615                   | 1613             | Humulene epoxide II                                      | 0.00          | 0.02          | 0.01          | 0.02          | 0.00          | 0.02          | 0.00          |
| 1628                   | 1623             | Humulane-1,6-dien-3-ol                                   | 0.07          | 0.12          | 0.07          | 0.00          | 0.01          | 0.03          | 0.03          |
| 1628                   | 1627             | Germacra-1(10),5-dien-4 $\alpha$ -<br>ol                 | 0.00          | 0.00          | 0.00          | 0.00          | 0.00          | 0.05          | 0.02          |
| 1634                   | 1631             | 1- <i>epi</i> -Cubenol                                   | 0.00          | 0.00          | 0.00          | 0.00          | 0.00          | 0.07          | 0.04          |
| 1634                   | ---              | Unidentified                                             | 0.00          | 0.00          | 0.00          | 0.00          | 0.00          | 0.00          | 0.17          |
| 1635                   | 1629             | <i>iso</i> -Spathulenol                                  | 0.00          | 0.00          | 0.00          | 0.00          | 0.00          | 0.00          | 0.00          |
| 1640                   | 1633             | $\gamma$ -Eudesmol                                       | 0.00          | 0.00          | 0.00          | 0.00          | 0.00          | 0.00          | 0.00          |
| 1640                   | 1642             | Caryophylla-4(12),8(13)-<br>dien-5 $\alpha$ -ol          | 0.00          | 0.00          | 0.00          | 0.00          | 0.00          | 0.00          | 0.00          |
| 1641                   | 1644             | Caryophylla-4(12),8(13)-<br>dien-5 $\beta$ -ol           | 0.00          | 0.00          | 0.00          | 0.03          | 0.00          | 0.00          | 0.00          |
| 1642                   | 1638             | (2 <i>S</i> ,5 <i>E</i> )-Caryophyll-5-en-<br>12-al      | 0.00          | 0.00          | 0.00          | 0.02          | 0.00          | 0.00          | 0.00          |
| 1647                   | 1643             | Cubenol                                                  | 0.00          | 0.00          | 0.00          | 0.05          | 0.00          | 0.07          | 0.03          |
| <b>1650</b>            | <b>1651</b>      | <b><math>\alpha</math>-Muurolol</b>                      | <b>0.51</b>   | <b>0.43</b>   | <b>0.51</b>   | <b>1.06</b>   | <b>0.15</b>   | <b>1.93</b>   | <b>1.18</b>   |
| 1658                   | 1655             | $\alpha$ -Eudesmol                                       | 0.00          | 0.00          | 0.00          | 0.00          | 0.00          | 0.00          | 0.00          |
| 1658                   | 1655             | $\alpha$ -Cadinol                                        | 0.00          | 0.00          | 0.00          | 0.00          | 0.00          | 0.00          | 0.00          |
| 1658                   | 1656             | $\beta$ -Eudesmol                                        | 0.00          | 0.00          | 0.00          | 0.02          | 0.00          | 0.03          | 0.03          |
| 1660                   | 1660             | Selin-11-en-4 $\alpha$ -ol                               | 0.00          | 0.04          | 0.02          | 0.01          | 0.02          | 0.02          | 0.01          |
| 1671                   | 1666             | 14-Hydroxy-9- <i>epi</i> -( <i>E</i> )-<br>caryophyllene | 0.00          | 0.00          | 0.00          | 0.05          | 0.00          | 0.07          | 0.00          |
| 1681                   | 1676             | Bornyl 8-<br>hydroxyisobutanoate                         | 0.00          | 0.00          | 0.00          | 0.00          | 0.00          | 0.00          | 0.00          |
| 2052                   | 2050             | Bornyl hydrocinnamate                                    | 0.00          | 0.00          | 0.00          | 0.02          | 0.00          | 0.09          | 0.03          |
| 2151                   | 2152             | 3-Phenylpropyl 3-<br>phenylpropanoate                    | 0.00          | 0.00          | 0.00          | 0.04          | 0.00          | 0.24          | 0.02          |
| <b>2224</b>            | <b>2223</b>      | <b>Bornyl cinnamate</b>                                  | <b>0.47</b>   | <b>0.71</b>   | <b>0.84</b>   | <b>0.56</b>   | <b>0.76</b>   | <b>1.20</b>   | <b>0.12</b>   |
| 2318                   | 2321             | 3-Phenylpropyl cinnamate                                 | 0.00          | 0.00          | 0.03          | 0.01          | 0.00          | 0.06          | 0.00          |
| 2434                   | 2432             | Phenylallyl cinnamate                                    | 0.00          | 0.04          | 0.03          | 0.01          | 0.00          | 0.00          | 0.00          |
|                        |                  | Monoterpene<br>hydrocarbons                              | 70.23         | 59.76         | 74.87         | 63.30         | 85.16         | 69.51         | 65.65         |
|                        |                  | Oxygenated<br>monoterpenoids                             | 2.76          | 3.36          | 2.00          | 3.92          | 5.84          | 9.80          | 8.46          |
|                        |                  | Sesquiterpene<br>hydrocarbons                            | 24.82         | 33.38         | 20.35         | 28.32         | 7.60          | 13.89         | 22.56         |
|                        |                  | Oxygenated<br>sesquiterpenoids                           | 1.46          | 2.43          | 1.54          | 2.85          | 0.46          | 4.11          | 2.19          |

| RI <sub>calc</sub> | RI <sub>db</sub> | Compound            | LD1909<br>10G | LD1909<br>10H | LD190<br>910I | LD190<br>910J | LD190<br>910K | LD190<br>910L | LD1909<br>10M |
|--------------------|------------------|---------------------|---------------|---------------|---------------|---------------|---------------|---------------|---------------|
|                    |                  | Benzenoid aromatics | 0.54          | 0.77          | 0.97          | 1.19          | 0.80          | 2.05          | 0.85          |
|                    |                  | Others              | 0.00          | 0.00          | 0.00          | 0.00          | 0.00          | 0.02          | 0.00          |
|                    |                  | Total identified    | 99.80         | 99.70         | 99.73         | 99.57         | 99.86         | 99.38         | 99.72         |

RI<sub>calc</sub>: Retention indices determined with respect to a homologous series of *n*-alkanes on a ZB-5ms column. RI<sub>db</sub>: Retention indices from the databases. Compounds in **boldface** were used in the multivariate (HCA and PCA) analyses.

Table S1. Continued.

| RI <sub>calc</sub> | RI <sub>db</sub> | Compound                                 | LD1909<br>10N | LD1909<br>10O | LD1909<br>10P | LD1909<br>10Q | LD1909<br>10R | LD1909<br>10S | LD1909<br>10T |
|--------------------|------------------|------------------------------------------|---------------|---------------|---------------|---------------|---------------|---------------|---------------|
| 763                | 76<br>3          | Toluene                                  | 0.00          | 0.00          | 0.00          | 0.00          | 0.00          | 0.00          | 0.31          |
| 863                | 85<br>7          | Ethylbenzene                             | 0.00          | 0.00          | 0.03          | 0.07          | 0.00          | 0.00          | 0.09          |
| 893                | 89<br>1          | Styrene                                  | 0.04          | 0.14          | 0.13          | 0.22          | 0.30          | 0.26          | 2.18          |
| 900                | 89<br>3          | 2-Bornene                                | 0.00          | 0.00          | 0.00          | 0.00          | 0.00          | 0.00          | 0.72          |
| 908                | 91<br>0          | ( <i>E</i> )-2,6-Dimethyl-4-octene       | 0.00          | 0.00          | 0.00          | 0.00          | 0.00          | 0.00          | 0.00          |
| 920                | 91<br>9          | 5,5-Dimethyl-1-vinylbicyclo[2.1.1]hexane | 0.00          | 0.00          | 0.00          | 0.00          | 0.00          | 0.00          | 0.00          |
| 923                | 92<br>2          | Tricyclene                               | 0.25          | 0.24          | 0.20          | 0.07          | 0.01          | 0.13          | 1.54          |
| 929                | 92<br>7          | $\alpha$ -Thujene                        | 0.32          | 0.32          | 0.29          | 0.08          | 0.02          | 0.23          | 0.12          |
| <b>938</b>         | <b>93<br/>3</b>  | <b><math>\alpha</math>-Pinene</b>        | <b>20.61</b>  | <b>20.91</b>  | <b>19.20</b>  | <b>5.75</b>   | <b>0.56</b>   | <b>11.76</b>  | <b>9.46</b>   |
| 945                | 94<br>8          | $\beta$ -Citronellene                    | 0.00          | 0.00          | 0.01          | 0.00          | 0.00          | 0.00          | 0.00          |
| 948                | 94<br>7          | Allylbenzene                             | 0.02          | 0.04          | 0.13          | 0.20          | 0.00          | 0.03          | 0.53          |
| 951                | 94<br>8          | $\alpha$ -Fenchene                       | 0.00          | 0.00          | 0.00          | 0.01          | 0.00          | 0.00          | 0.00          |
| <b>953</b>         | <b>95<br/>3</b>  | <b>Camphene</b>                          | <b>10.84</b>  | <b>9.38</b>   | <b>8.36</b>   | <b>3.04</b>   | <b>0.31</b>   | <b>5.21</b>   | <b>4.47</b>   |
| 956                | 95<br>3          | Thuja-2,4(10)-diene                      | 0.01          | 0.01          | 0.01          | 0.01          | 0.00          | 0.00          | 0.05          |
| 964                | 96<br>4          | Benzaldehyde                             | 0.00          | 0.00          | 0.00          | 0.00          | 0.00          | 0.00          | 0.02          |
| 966                | 96<br>4          | ( <i>Z</i> )-3,7-Dimethyl-2-octene       | 0.00          | 0.01          | 0.05          | 0.02          | 0.00          | 0.01          | 0.03          |
| 973                | 97<br>2          | <b>Sabinene</b>                          | <b>2.00</b>   | <b>1.58</b>   | <b>1.36</b>   | <b>0.35</b>   | <b>0.08</b>   | <b>1.08</b>   | <b>0.64</b>   |
| 979                | 97<br>8          | <b><math>\beta</math>-Pinene</b>         | <b>16.26</b>  | <b>14.93</b>  | <b>13.99</b>  | <b>4.50</b>   | <b>0.57</b>   | <b>9.18</b>   | <b>7.29</b>   |
| 982                | 98<br>8          | $\alpha$ -Methylstyrene                  | 0.00          | 0.00          | 0.00          | 0.00          | 0.00          | 0.00          | 0.02          |
| <b>987</b>         | <b>99<br/>1</b>  | <b>Myrcene</b>                           | <b>1.18</b>   | <b>0.32</b>   | <b>0.09</b>   | <b>0.07</b>   | <b>0.07</b>   | <b>0.41</b>   | <b>0.11</b>   |
| 989                | 99<br>0          | 2,3-Dehydro-1,8-cineole                  | 0.02          | 0.01          | 0.01          | 0.01          | 0.02          | 0.01          | 0.01          |
| 991                | 99<br>0          | <i>o</i> -Methylstyrene                  | 0.00          | 0.00          | 0.00          | 0.00          | 0.00          | 0.00          | 0.09          |
| 999                | 99<br>7          | <i>p</i> -Menth-2-ene                    | 0.01          | 0.03          | 0.24          | 0.08          | 0.00          | 0.04          | 0.04          |
| 100<br>2           | 10<br>04         | <i>p</i> -Menth-1(7),8-diene             | 0.00          | 0.00          | 0.00          | 0.00          | 0.00          | 0.00          | 0.00          |
| 100<br>5           | 10<br>07         | $\alpha$ -Phellandrene                   | 0.02          | 0.03          | 0.05          | 0.02          | 0.03          | 0.00          | 0.03          |
| 100<br>7           | 10<br>08         | $\delta$ -3-Carene                       | 0.01          | 0.01          | 0.01          | 0.00          | 0.00          | 0.01          | 0.00          |



| RI <sub>alc</sub> | RI <sub>db</sub> | Compound                                  | LD1909<br>10N | LD1909<br>10O | LD1909<br>10P | LD1909<br>10Q | LD1909<br>10R | LD1909<br>10S | LD1909<br>10T |
|-------------------|------------------|-------------------------------------------|---------------|---------------|---------------|---------------|---------------|---------------|---------------|
| 101<br>5          | 10<br>18         | $\alpha$ -Terpinene                       | 0.05          | 0.05          | 0.18          | 0.06          | 0.00          | 0.07          | 0.06          |
| 102<br>1          | 10<br>22         | (2E,4E)-3,7-Dimethylocta-2,4-diene        | 0.42          | 0.51          | 0.99          | 0.16          | 0.48          | 0.00          | 0.57          |
| 102<br>3          | 10<br>25         | <i>p</i> -Cymene                          | 0.11          | 0.26          | 1.86          | 0.73          | 0.00          | 0.28          | 0.53          |
| 102<br>6          | 10<br>28         | Indane                                    | 0.00          | 0.00          | 0.00          | 0.02          | 0.00          | 0.00          | 0.65          |
| 102<br>8          | 10<br>30         | Limonene                                  | 7.85          | 2.45          | 2.65          | 0.86          | 0.16          | 1.85          | 1.27          |
| 103<br>0          | 10<br>31         | $\beta$ -Phellandrene                     | 0.17          | 0.16          | 0.29          | 0.06          | 0.02          | 0.22          | 0.15          |
| 103<br>1          | 10<br>32         | 1,8-Cineole                               | 0.14          | 0.08          | 0.12          | 0.03          | 0.00          | 0.05          | 0.02          |
| 103<br>4          | 10<br>34         | (Z)- $\beta$ -Ocimene                     | 0.02          | 0.01          | 0.02          | 0.01          | 0.00          | 0.01          | 0.01          |
| 104<br>4          | 10<br>46         | (E)- $\beta$ -Ocimene                     | 0.03          | 0.05          | 0.05          | 0.01          | 0.03          | 0.00          | 0.07          |
| 105<br>7          | 10<br>58         | $\gamma$ -Terpinene                       | 0.08          | 0.10          | 0.32          | 0.10          | 0.01          | 0.10          | 0.13          |
| 106<br>0          | 10<br>64         | Benzenemethanol                           | 0.00          | 0.00          | 0.00          | 0.01          | 0.00          | 0.00          | 0.00          |
| 106<br>6          | 10<br>68         | Acetophenone                              | 0.00          | 0.20          | 0.23          | 0.33          | 0.19          | 0.14          | 0.11          |
| 106<br>9          | 10<br>69         | <i>cis</i> -Sabinene hydrate              | 0.05          | 0.03          | 0.03          | 0.02          | 0.00          | 0.02          | 0.03          |
| 108<br>5          | 10<br>86         | Terpinolene                               | 0.16          | 0.08          | 0.13          | 0.04          | 0.01          | 0.11          | 0.06          |
| 108<br>9          | 10<br>90         | Fenchone                                  | 0.00          | 0.00          | 0.01          | 0.00          | 0.00          | 0.00          | 0.00          |
| 109<br>1          | 10<br>93         | <i>p</i> -Cymenene                        | 0.00          | 0.00          | 0.00          | 0.00          | 0.00          | 0.00          | 0.02          |
| 109<br>9          | 10<br>98         | Perillene                                 | 0.00          | 0.00          | 0.00          | 0.00          | 0.00          | 0.00          | 0.00          |
| 109<br>9          | 11<br>01         | $\alpha$ -Pinene oxide                    | 0.00          | 0.00          | 0.00          | 0.00          | 0.00          | 0.00          | 0.00          |
| 110<br>0          | 11<br>01         | Linalool                                  | 0.08          | 0.02          | 0.02          | 0.02          | 0.01          | 0.04          | 0.03          |
| 110<br>1          | 11<br>01         | <i>trans</i> -Sabinene hydrate            | 0.02          | 0.01          | 0.01          | 0.00          | 0.00          | 0.01          | 0.00          |
| 112<br>1          | 11<br>21         | <i>exo</i> -Fenchol (= $\beta$ -Fenchol)  | 0.00          | 0.00          | 0.00          | 0.00          | 0.00          | 0.00          | 0.00          |
| 112<br>3          | 11<br>22         | Chrystanthene                             | 0.00          | 0.00          | 0.00          | 0.00          | 0.00          | 0.00          | 0.00          |
| 112<br>3          | 11<br>22         | <i>trans-p</i> -Mentha-2,8-dien-1-ol      | 0.00          | 0.00          | 0.00          | 0.00          | 0.00          | 0.00          | 0.00          |
| 112<br>5          | 12<br>24         | <i>p</i> -Menth-1-en-9-al                 | 0.00          | 0.00          | 0.00          | 0.00          | 0.00          | 0.00          | 0.06          |
| 112<br>6          | 11<br>24         | <i>cis-p</i> -Menth-2-en-1-ol             | 0.01          | 0.00          | 0.01          | 0.00          | 0.00          | 0.00          | 0.00          |
| 112<br>8          | 11<br>27         | $\alpha$ -Campholenal                     | 0.00          | 0.00          | 0.00          | 0.00          | 0.00          | 0.00          | 0.00          |
| 113<br>4          | 11<br>34         | <i>cis</i> -Limonene oxide                | 0.00          | 0.00          | 0.00          | 0.00          | 0.00          | 0.00          | 0.00          |
| 114<br>3          | 11<br>41         | <i>trans</i> -Pinocarveol                 | 0.01          | 0.00          | 0.00          | 0.00          | 0.00          | 0.00          | 0.00          |
| 114<br>4          | 11<br>41         | <i>cis</i> -Verbenol                      | 0.00          | 0.00          | 0.00          | 0.00          | 0.00          | 0.00          | 0.00          |
| 114<br>5          | 11<br>42         | <i>trans-p</i> -Menth-2-en-1-ol           | 0.01          | 0.00          | 0.01          | 0.00          | 0.00          | 0.00          | 0.00          |
| 114<br>5          | 11<br>43         | <i>trans</i> -Dihydro- $\beta$ -terpineol | 0.00          | 0.00          | 0.00          | 0.00          | 0.00          | 0.00          | 0.00          |
| 114<br>8          | 11<br>46         | <i>trans</i> -Verbenol                    | 0.03          | 0.02          | 0.00          | 0.00          | 0.00          | 0.00          | 0.00          |





| RI <sub>c</sub><br>alc | RI<br>db         | Compound                                  | LD1909<br>10N | LD1909<br>10O | LD1909<br>10P | LD1909<br>10Q | LD1909<br>10R | LD1909<br>10S | LD1909<br>10T |
|------------------------|------------------|-------------------------------------------|---------------|---------------|---------------|---------------|---------------|---------------|---------------|
| 145<br>1               | 14<br>52         | ( <i>E</i> )- $\beta$ -Farnesene          | 0.00          | 0.00          | 0.00          | 0.00          | 0.00          | 0.00          | 0.00          |
| 145<br>2               | 14<br>53         | $\epsilon$ -Muurolene                     | 0.00          | 0.00          | 0.00          | 0.00          | 0.00          | 0.00          | 0.00          |
| 145<br>2               | 14<br>55         | Sesquisabinene                            | 0.01          | 0.00          | 0.03          | 0.00          | 0.03          | 0.01          | 0.01          |
| 145<br>3               | 14<br>55         | Valerena-4,7(11)-diene                    | 0.00          | 0.00          | 0.00          | 0.00          | 0.00          | 0.00          | 0.00          |
| <b>145<br/>6</b>       | <b>14<br/>54</b> | <b><math>\alpha</math>-Humulene</b>       | <b>0.38</b>   | <b>0.70</b>   | <b>0.66</b>   | <b>1.11</b>   | <b>2.03</b>   | <b>1.14</b>   | <b>1.20</b>   |
| 145<br>9               | 14<br>61         | <i>cis</i> -Cadina-1(6),4-diene           | 0.00          | 0.00          | 0.00          | 0.04          | 0.00          | 0.00          | 0.00          |
| 146<br>1               | 14<br>64         | 9- <i>epi</i> -( <i>E</i> )-Caryophyllene | 0.01          | 0.00          | 0.01          | 0.00          | 0.01          | 0.01          | 0.01          |
| 146<br>3               | 14<br>63         | <i>cis</i> -Muurolo-4(14),5-diene         | 0.01          | 0.02          | 0.04          | 0.14          | 0.11          | 0.03          | 0.03          |
| 147<br>0               | 14<br>71         | 4,5-di- <i>epi</i> -Aristolochene         | 0.00          | 0.00          | 0.00          | 0.00          | 0.00          | 0.00          | 0.00          |
| 147<br>2               | 14<br>72         | <i>trans</i> -Cadina-1(6),4-diene         | 0.03          | 0.06          | 0.07          | 0.23          | 0.14          | 0.09          | 0.06          |
| 147<br>3               | 14<br>75         | Selina-4,11-diene                         | 0.00          | 0.00          | 0.00          | 0.00          | 0.00          | 0.00          | 0.00          |
| <b>147<br/>5</b>       | <b>14<br/>78</b> | <b><math>\gamma</math>-Muurolene</b>      | <b>0.49</b>   | <b>0.81</b>   | <b>0.67</b>   | <b>1.87</b>   | <b>1.76</b>   | <b>1.14</b>   | <b>1.02</b>   |
| 147<br>8               | 14<br>80         | <i>cis</i> -4,10-Epoxyamorphane           | 0.26          | 0.36          | 0.28          | 0.61          | 0.58          | 0.28          | 0.41          |
| 147<br>8               | 14<br>83         | $\alpha$ -Amorphene                       | 0.00          | 0.00          | 0.00          | 0.00          | 0.00          | 0.00          | 0.00          |
| <b>148<br/>2</b>       | <b>14<br/>80</b> | <b>Germacrene D</b>                       | <b>0.26</b>   | <b>0.64</b>   | <b>3.23</b>   | <b>5.49</b>   | <b>4.41</b>   | <b>0.98</b>   | <b>0.68</b>   |
| 148<br>7               | 14<br>88         | $\delta$ -Selinene                        | 0.00          | 0.00          | 0.00          | 0.00          | 0.00          | 0.00          | 0.00          |
| 148<br>8               | 14<br>91         | Eremophilene                              | 0.00          | 0.00          | 0.00          | 0.00          | 0.00          | 0.00          | 0.00          |
| 149<br>0               | 14<br>87         | $\beta$ -Selinene                         | 0.00          | 0.16          | 0.01          | 0.03          | 0.02          | 0.01          | 0.01          |
| 149<br>3               | 14<br>90         | $\gamma$ -Amorphene                       | 0.08          | 0.16          | 0.15          | 0.61          | 0.52          | 0.20          | 0.19          |
| 149<br>6               | 14<br>97         | $\alpha$ -Selinene                        | 0.00          | 0.00          | 0.00          | 0.00          | 0.00          | 0.00          | 0.00          |
| 149<br>6               | 14<br>98         | <i>epi</i> -Cubebol                       | 0.11          | 0.33          | 0.19          | 0.58          | 0.47          | 0.26          | 0.23          |
| 149<br>7               | 14<br>98         | Bicyclgermacrene                          | 0.00          | 0.00          | 0.00          | 0.00          | 0.06          | 0.00          | 0.00          |
| <b>149<br/>9</b>       | <b>14<br/>97</b> | <b><math>\alpha</math>-Muurolene</b>      | <b>0.64</b>   | <b>1.02</b>   | <b>0.83</b>   | <b>2.39</b>   | <b>2.44</b>   | <b>1.49</b>   | <b>1.38</b>   |
| 150<br>2               | 14<br>97         | Valencene                                 | 0.00          | 0.00          | 0.00          | 0.13          | 0.00          | 0.05          | 0.00          |
| 150<br>2               | 15<br>04         | <i>iso</i> -Daucene                       | 0.00          | 0.00          | 0.09          | 0.00          | 0.00          | 0.00          | 0.00          |
| 150<br>3               | 15<br>03         | ( <i>E,E</i> )- $\alpha$ -Farnesene       | 0.04          | 0.00          | 0.05          | 0.00          | 0.10          | 0.00          | 0.11          |
| 150<br>3               | 15<br>06         | $\delta$ -Amorphene                       | 0.00          | 0.00          | 0.00          | 0.00          | 0.00          | 0.00          | 0.00          |
| 150<br>5               | 15<br>05         | $\alpha$ -Bulnesene                       | 0.00          | 0.31          | 0.01          | 0.03          | 0.00          | 0.02          | 0.00          |
| 150<br>8               | 15<br>08         | $\beta$ -Bisabolene                       | 0.05          | 0.00          | 0.00          | 0.00          | 0.00          | 0.00          | 0.00          |
| 150<br>9               | 15<br>11         | Germacrene A                              | 0.00          | 0.00          | 0.00          | 0.00          | 0.00          | 0.00          | 0.00          |
| 151<br>4               | 15<br>12         | $\gamma$ -Cadinene                        | 0.00          | 0.00          | 0.04          | 0.10          | 0.07          | 0.03          | 0.02          |
| <b>151<br/>6</b>       | <b>15<br/>19</b> | <b>Cubebol</b>                            | <b>0.31</b>   | <b>0.51</b>   | <b>0.39</b>   | <b>1.23</b>   | <b>1.38</b>   | <b>0.68</b>   | <b>0.78</b>   |



| RI <sub>calc</sub> | RI <sub>db</sub> | Compound                          | LD1909<br>10N | LD1909<br>10O | LD1909<br>10P | LD1909<br>10Q | LD1909<br>10R | LD1909<br>10S | LD1909<br>10T |
|--------------------|------------------|-----------------------------------|---------------|---------------|---------------|---------------|---------------|---------------|---------------|
| 168                | 16               | Bornyl 8-hydroxyisobutanoate      | 0.00          | 0.00          | 0.00          | 0.00          | 0.00          | 0.00          | 0.00          |
| 1                  | 76               |                                   |               |               |               |               |               |               |               |
| 205                | 20               | Bornyl hydrocinnamate             | 0.02          | 0.01          | 0.02          | 0.02          | 0.00          | 0.00          | 0.02          |
| 2                  | 50               |                                   |               |               |               |               |               |               |               |
| 215                | 21               | 3-Phenylpropyl 3-phenylpropanoate | 0.02          | 0.02          | 0.00          | 0.03          | 0.02          | 0.00          | 0.04          |
| 1                  | 52               |                                   |               |               |               |               |               |               |               |
| <b>222</b>         | <b>22</b>        | <b>Bornyl cinnamate</b>           | <b>0.43</b>   | <b>0.60</b>   | <b>0.81</b>   | <b>0.23</b>   | <b>0.25</b>   | <b>0.16</b>   | <b>0.95</b>   |
| 231                | 23               | 3-Phenylpropyl cinnamate          | 0.03          | 0.02          | 0.00          | 0.03          | 0.00          | 0.00          | 0.10          |
| 8                  | 21               |                                   |               |               |               |               |               |               |               |
| 243                | 24               | Phenylallyl cinnamate             | 0.00          | 0.00          | 0.00          | 0.00          | 0.00          | 0.00          | 0.04          |
| 4                  | 32               |                                   |               |               |               |               |               |               |               |
|                    |                  | Monoterpene hydrocarbons          | 60.39         | 51.45         | 50.34         | 16.03         | 2.36          | 30.68         | 27.35         |
|                    |                  | Oxygenated monoterpenoids         | 12.81         | 3.23          | 4.07          | 5.24          | 0.55          | 5.51          | 2.22          |
|                    |                  | Sesquiterpene hydrocarbons        | 22.98         | 37.73         | 39.64         | 67.79         | 87.54         | 56.43         | 57.60         |
|                    |                  | Oxygenated sesquiterpenoids       | 2.87          | 5.70          | 3.93          | 8.28          | 7.30          | 5.15          | 6.26          |
|                    |                  | Benzenoid aromatics               | 0.63          | 1.16          | 1.36          | 1.54          | 1.17          | 0.70          | 5.23          |
|                    |                  | Others                            | 0.00          | 0.00          | 0.00          | 0.00          | 0.00          | 0.00          | 0.00          |
|                    |                  | Total identified                  | 99.67         | 99.27         | 99.34         | 98.88         | 98.93         | 98.46         | 98.64         |

RI<sub>calc</sub>: Retention indices determined with respect to a homologous series of *n*-alkanes on a ZB-5ms column. RI<sub>db</sub>: Retention indices from the databases. Compounds in **boldface** were used in the multivariate (HCA and PCA) analyses.

Table S1. Continued.

| RI <sub>calc</sub> | RI <sub>db</sub> | Compound                                                | LD190910U    | LD190910V    | LD190910W    | LD190910X   |
|--------------------|------------------|---------------------------------------------------------|--------------|--------------|--------------|-------------|
| 763                | 763              | Toluene                                                 | 0.00         | 0.00         | 0.00         | 0.00        |
| 863                | 857              | Ethylbenzene                                            | 0.00         | 0.00         | 0.00         | 0.00        |
| 893                | 891              | Styrene                                                 | 0.06         | 0.11         | 0.06         | 0.00        |
| 900                | 893              | 2-Bornene                                               | 0.00         | 0.00         | 0.00         | 0.00        |
| 908                | 910              | ( <i>E</i> )-2,6-Dimethyl-4-octene                      | 0.00         | 0.00         | 0.00         | 0.00        |
| 920                | 919              | 5,5-Dimethyl-1-vinylbicyclo[2.1.1]hexane                | 0.00         | 0.00         | 0.00         | 0.00        |
| 923                | 922              | Tricyclene                                              | 0.23         | 0.18         | 0.26         | 0.01        |
| 929                | 927              | $\alpha$ -Thujene                                       | 0.28         | 0.27         | 0.54         | 0.05        |
| <b>938</b>         | <b>933</b>       | <b><math>\alpha</math>-Pinene</b>                       | <b>15.27</b> | <b>15.67</b> | <b>29.07</b> | <b>3.82</b> |
| 945                | 948              | $\beta$ -Citronellene                                   | 0.00         | 0.05         | 0.00         | 0.00        |
| 948                | 947              | Allylbenzene                                            | 0.05         | 0.51         | 0.05         | 0.02        |
| 951                | 948              | $\alpha$ -Fenchene                                      | 0.01         | 0.01         | 0.00         | 0.01        |
| <b>953</b>         | <b>953</b>       | <b>Camphene</b>                                         | <b>8.54</b>  | <b>7.71</b>  | <b>10.99</b> | <b>0.34</b> |
| 956                | 953              | Thuja-2,4(10)-diene                                     | 0.00         | 0.01         | 0.00         | 0.00        |
| 964                | 964              | Benzaldehyde                                            | 0.00         | 0.00         | 0.00         | 0.00        |
| 966                | 964              | ( <i>Z</i> )-3,7-Dimethyl-2-octene                      | 0.02         | 0.12         | 0.07         | 0.08        |
| <b>973</b>         | <b>972</b>       | <b>Sabinene</b>                                         | <b>1.46</b>  | <b>0.43</b>  | <b>2.35</b>  | <b>0.02</b> |
| <b>979</b>         | <b>978</b>       | <b><math>\beta</math>-Pinene</b>                        | <b>10.92</b> | <b>11.71</b> | <b>26.03</b> | <b>5.65</b> |
| 982                | 988              | $\alpha$ -Methylstyrene                                 | 0.00         | 0.00         | 0.00         | 0.00        |
| <b>987</b>         | <b>991</b>       | <b>Myrcene</b>                                          | <b>0.27</b>  | <b>0.33</b>  | <b>5.12</b>  | <b>1.34</b> |
| 989                | 990              | 2,3-Dehydro-1,8-cineole                                 | 0.00         | 0.00         | 0.00         | 0.00        |
| 991                | 990              | <i>o</i> -Methylstyrene                                 | 0.00         | 0.00         | 0.00         | 0.00        |
| 999                | 997              | <i>p</i> -Menth-2-ene                                   | 0.04         | 0.10         | 0.02         | 0.13        |
| 1002               | 1004             | <i>p</i> -Menth-1(7),8-diene                            | 0.00         | 0.00         | 0.01         | 0.00        |
| 1005               | 1007             | $\alpha$ -Phellandrene                                  | 0.03         | 0.05         | 0.03         | 0.01        |
| 1007               | 1008             | $\delta$ -3-Carene                                      | 0.01         | 0.01         | 0.01         | 0.00        |
| 1015               | 1018             | $\alpha$ -Terpinene                                     | 0.06         | 0.14         | 0.06         | 0.02        |
| <b>1021</b>        | <b>1022</b>      | <b>(2<i>E</i>,4<i>E</i>)-3,7-Dimethylocta-2,4-diene</b> | <b>0.89</b>  | <b>0.19</b>  | <b>0.08</b>  | <b>0.36</b> |
| <b>1023</b>        | <b>1025</b>      | <b><i>p</i>-Cymene</b>                                  | <b>0.41</b>  | <b>1.29</b>  | <b>0.28</b>  | <b>0.58</b> |
| 1026               | 1028             | Indane                                                  | 0.00         | 0.02         | 0.00         | 0.00        |
| <b>1028</b>        | <b>1030</b>      | <b>Limonene</b>                                         | <b>5.65</b>  | <b>2.97</b>  | <b>6.75</b>  | <b>0.57</b> |
| 1030               | 1031             | $\beta$ -Phellandrene                                   | 0.18         | 0.11         | 0.12         | 0.08        |
| 1031               | 1032             | 1,8-Cineole                                             | 0.15         | 0.09         | 0.15         | 0.03        |
| 1034               | 1034             | ( <i>Z</i> )- $\beta$ -Ocimene                          | 0.02         | 0.03         | 0.02         | 0.02        |
| 1044               | 1046             | ( <i>E</i> )- $\beta$ -Ocimene                          | 0.07         | 0.07         | 0.04         | 0.07        |
| 1057               | 1058             | $\gamma$ -Terpinene                                     | 0.13         | 0.30         | 0.13         | 0.10        |
| 1060               | 1064             | Benzenemethanol                                         | 0.00         | 0.00         | 0.00         | 0.00        |

| RI <sub>calc</sub> | RI <sub>db</sub> | Compound                                   | LD190910U   | LD190910V   | LD190910W   | LD190910X   |
|--------------------|------------------|--------------------------------------------|-------------|-------------|-------------|-------------|
| 1066               | 1068             | Acetophenone                               | 0.10        | 0.01        | 0.00        | 0.00        |
| 1069               | 1069             | <i>cis</i> -Sabinene hydrate               | 0.03        | 0.03        | 0.04        | 0.00        |
| 1085               | 1086             | Terpinolene                                | 0.13        | 0.18        | 0.12        | 0.07        |
| 1089               | 1090             | Fenchone                                   | 0.00        | 0.00        | 0.00        | 0.00        |
| 1091               | 1093             | <i>p</i> -Cymenene                         | 0.00        | 0.00        | 0.00        | 0.00        |
| 1099               | 1098             | Perillene                                  | 0.00        | 0.00        | 0.02        | 0.00        |
| 1099               | 1101             | $\alpha$ -Pinene oxide                     | 0.00        | 0.00        | 0.00        | 0.00        |
| 1100               | 1101             | Linalool                                   | 0.05        | 0.03        | 0.06        | 0.00        |
| 1101               | 1101             | <i>trans</i> -Sabinene hydrate             | 0.01        | 0.02        | 0.03        | 0.00        |
| 1121               | 1121             | <i>exo</i> -Fenchol (= $\beta$ -Fenchol)   | 0.00        | 0.01        | 0.00        | 0.01        |
| 1123               | 1122             | Chrystanthenone                            | 0.00        | 0.00        | 0.00        | 0.00        |
| 1123               | 1122             | <i>trans-p</i> -Mentha-2,8-dien-1-ol       | 0.00        | 0.00        | 0.00        | 0.00        |
| 1125               | 1224             | <i>p</i> -Menth-1-en-9-al                  | 0.00        | 0.01        | 0.00        | 0.00        |
| 1126               | 1124             | <i>cis-p</i> -Menth-2-en-1-ol              | 0.00        | 0.01        | 0.00        | 0.00        |
| 1128               | 1127             | $\alpha$ -Campholenal                      | 0.00        | 0.00        | 0.01        | 0.00        |
| 1134               | 1134             | <i>cis</i> -Limonene oxide                 | 0.00        | 0.00        | 0.00        | 0.00        |
| 1143               | 1141             | <i>trans</i> -Pinocarveol                  | 0.00        | 0.02        | 0.02        | 0.00        |
| 1144               | 1141             | <i>cis</i> -Verbenol                       | 0.00        | 0.00        | 0.00        | 0.00        |
| 1145               | 1142             | <i>trans-p</i> -Menth-2-en-1-ol            | 0.00        | 0.01        | 0.01        | 0.00        |
| 1145               | 1143             | <i>trans</i> -Dihydro- $\beta$ -terpineol  | 0.00        | 0.00        | 0.00        | 0.00        |
| 1148               | 1146             | <i>trans</i> -Verbenol                     | 0.00        | 0.02        | 0.02        | 0.00        |
| <b>1150</b>        | <b>1149</b>      | <b>Camphor</b>                             | <b>1.02</b> | <b>0.23</b> | <b>0.04</b> | <b>0.04</b> |
| 1151               | 1149             | <i>trans</i> -Dihydro- $\alpha$ -terpineol | 0.00        | 0.00        | 0.00        | 0.00        |
| 1152               | 1150             | $\alpha$ -Phellandren-8-ol                 | 0.00        | 0.00        | 0.00        | 0.00        |
| 1158               | 1156             | Camphene hydrate                           | 0.00        | 0.02        | 0.00        | 0.00        |
| 1159               | 1157             | Sabina ketone                              | 0.00        | 0.00        | 0.00        | 0.00        |
| 1160               | 1158             | Menthone                                   | 0.00        | 0.00        | 0.00        | 0.00        |
| 1163               | 1160             | <i>trans</i> -Pinocamphone                 | 0.00        | 0.00        | 0.00        | 0.00        |
| 1165               | 1164             | Pinocarvone                                | 0.01        | 0.00        | 0.00        | 0.00        |
| 1167               | 1164             | <i>cis</i> -Dihydro- $\alpha$ -terpineol   | 0.00        | 0.00        | 0.00        | 0.00        |
| 1167               | 1165             | Isoborneol                                 | 0.00        | 0.02        | 0.00        | 0.00        |
| 1170               | 1171             | 4-Ethylphenol                              | 0.00        | 0.00        | 0.00        | 0.00        |
| <b>1175</b>        | <b>1173</b>      | <b>Borneol</b>                             | <b>0.37</b> | <b>0.28</b> | <b>0.15</b> | <b>0.02</b> |
| 1179               | 1176             | <i>cis</i> -Pinocamphone                   | 0.00        | 0.00        | 0.00        | 0.00        |
| 1181               | 1179             | <i>iso</i> -Menthol                        | 0.00        | 0.00        | 0.00        | 0.00        |
| 1181               | 1179             | 2-Isopropenyl-5-methyl-4-hexenal           | 0.00        | 0.00        | 0.00        | 0.00        |
| 1184               | 1180             | Terpinen-4-ol                              | 0.17        | 0.31        | 0.17        | 0.14        |
| 1187               | 1183             | Myrtanal                                   | 0.00        | 0.00        | 0.00        | 0.00        |
| 1190               | 1187             | Cryptone                                   | 0.00        | 0.00        | 0.00        | 0.00        |
| 1190               | 1189             | <i>p</i> -Cymen-8-ol                       | 0.00        | 0.00        | 0.00        | 0.00        |
| 1198               | 1202             | Myrtenol                                   | 0.00        | 0.00        | 0.00        | 0.00        |
| 1199               | 1195             | $\alpha$ -Terpineol                        | 0.38        | 0.33        | 0.27        | 0.16        |
| 1202               | 1198             | ( <i>Z</i> )-Dihydrocarvone                | 0.00        | 0.00        | 0.00        | 0.00        |
| 1202               | 1201             | Estragole (= Methyl chavicol)              | 0.00        | 0.03        | 0.09        | 0.00        |
| 1211               | 1208             | Verbenone                                  | 0.01        | 0.01        | 0.00        | 0.00        |
| 1234               | 1235             | Hydrocinnamic alcohol (= Benzenepropanol)  | 0.05        | 0.03        | 0.00        | 0.00        |
| 1235               | 1232             | <i>cis</i> -Carveol                        | 0.00        | 0.00        | 0.00        | 0.00        |
| 1247               | 1246             | Carvone                                    | 0.00        | 0.00        | 0.00        | 0.00        |
| 1250               | 1246             | <i>trans</i> -Shisool                      | 0.00        | 0.00        | 0.00        | 0.00        |
| 1274               | 1276             | 2,3-Pinandediol                            | 0.00        | 0.00        | 0.00        | 0.00        |
| 1278               | 1273             | ( <i>E</i> )-Cinnamaldehyde                | 0.00        | 0.00        | 0.00        | 0.00        |
| 1280               | 1278             | Perilla aldehyde                           | 0.00        | 0.00        | 0.00        | 0.00        |
| 1283               | 1278             | <i>cis</i> -Verbenyl acetate               | 0.00        | 0.00        | 0.00        | 0.01        |
| <b>1286</b>        | <b>1285</b>      | <b>Bornyl acetate</b>                      | <b>0.76</b> | <b>6.12</b> | <b>6.28</b> | <b>1.58</b> |
| 1287               | 1287             | Isobornyl acetate                          | 0.00        | 0.02        | 0.02        | 0.00        |
| 1300               | 1297             | <i>p</i> -Menth-1-en-9-ol                  | 0.00        | 0.00        | 0.00        | 0.00        |
| 1300               | 1299             | Perilla alcohol                            | 0.00        | 0.00        | 0.00        | 0.00        |
| 1300               | 1300             | Carvacrol                                  | 0.00        | 0.00        | 0.00        | 0.00        |
| 1309               | 1309             | ( <i>E</i> )-Cinnamyl alcohol              | 0.00        | 0.00        | 0.00        | 0.00        |
| 1331               | 1334             | Bicycloelemene                             | 0.02        | 0.01        | 0.00        | 0.00        |
| 1334               | 1335             | $\delta$ -Elemene                          | 0.04        | 0.15        | 0.03        | 0.00        |
| <b>1349</b>        | <b>1349</b>      | <b><math>\alpha</math>-Cubebene</b>        | <b>0.25</b> | <b>0.54</b> | <b>0.10</b> | <b>1.41</b> |
| 1352               | 1352             | Ethyl hydrocinnamate                       | 0.00        | 0.00        | 0.00        | 0.00        |
| 1371               | 1367             | Cyclosativene                              | 0.18        | 0.19        | 0.06        | 0.40        |
| 1377               | 1375             | $\alpha$ -Copaene                          | 0.85        | 0.11        | 0.11        | 0.50        |

| RI <sub>calc</sub> | RI <sub>db</sub> | Compound                                       | LD190910U    | LD190910V    | LD190910W   | LD190910X    |
|--------------------|------------------|------------------------------------------------|--------------|--------------|-------------|--------------|
| 1380               | 1384             | Daucene                                        | 0.01         | 0.01         | 0.00        | 0.00         |
| 1383               | 1383             | <i>cis</i> - $\beta$ -Elemene                  | 0.17         | 0.00         | 0.00        | 0.00         |
| 1383               | 1385             | Isopropyl 3-phenylpropanoate                   | 0.00         | 0.00         | 0.00        | 0.00         |
| 1385               | 1382             | $\beta$ -Bourbonene                            | 0.11         | 0.01         | 0.00        | 0.02         |
| <b>1389</b>        | <b>1392</b>      | <b><math>\beta</math>-Cubebene</b>             | <b>1.84</b>  | <b>0.73</b>  | <b>0.37</b> | <b>0.11</b>  |
| <b>1391</b>        | <b>1390</b>      | <b><i>trans</i>-<math>\beta</math>-Elemene</b> | <b>3.14</b>  | <b>0.08</b>  | <b>0.02</b> | <b>0.03</b>  |
| 1394               | 1394             | Sativene                                       | 0.01         | 0.01         | 0.00        | 0.01         |
| 1406               | 1405             | ( <i>Z</i> )-Caryophyllene                     | 0.01         | 0.05         | 0.00        | 0.05         |
| <b>1423</b>        | <b>1424</b>      | <b>(<i>E</i>)-Caryophyllene</b>                | <b>22.84</b> | <b>34.84</b> | <b>6.46</b> | <b>50.30</b> |
| 1423               | 1428             | $\beta$ -Duprezianene                          | 0.00         | 0.00         | 0.01        | 0.00         |
| 1430               | 1432             | $\gamma$ -Elemene                              | 0.00         | 0.00         | 0.00        | 0.00         |
| <b>1431</b>        | <b>1433</b>      | <b><math>\beta</math>-Copaene</b>              | <b>1.68</b>  | <b>1.98</b>  | <b>0.56</b> | <b>3.58</b>  |
| 1433               | 1432             | <i>trans</i> - $\alpha$ -Bergamotene           | 0.03         | 0.00         | 0.02        | 0.00         |
| 1436               | 1436             | $\alpha$ -Guaiene                              | 0.42         | 0.00         | 0.00        | 0.00         |
| 1439               | 1442             | 6,9-Guaiadiene                                 | 0.00         | 0.01         | 0.00        | 0.00         |
| 1440               | 1439             | ( <i>Z</i> )- $\beta$ -Farnesene               | 0.02         | 0.00         | 0.00        | 0.00         |
| 1444               | 1445             | Selina-5,11-diene                              | 0.00         | 0.00         | 0.00        | 0.00         |
| 1445               | 1447             | <i>iso</i> -Germacrene D                       | 0.04         | 0.00         | 0.00        | 0.00         |
| 1446               | 1446             | <i>cis</i> -Muurolo-3,5-diene                  | 0.01         | 0.01         | 0.00        | 0.00         |
| 1450               | 1452             | <i>trans</i> -Muurolo-3,5-diene                | 0.07         | 0.08         | 0.01        | 0.16         |
| 1451               | 1452             | ( <i>E</i> )- $\beta$ -Farnesene               | 0.00         | 0.00         | 0.00        | 0.00         |
| 1452               | 1453             | $\epsilon$ -Muurolene                          | 0.05         | 0.00         | 0.00        | 0.00         |
| 1452               | 1455             | Sesquisabinene                                 | 0.02         | 0.00         | 0.00        | 0.00         |
| 1453               | 1455             | Valerena-4,7(11)-diene                         | 0.00         | 0.00         | 0.00        | 0.00         |
| <b>1456</b>        | <b>1454</b>      | <b><math>\alpha</math>-Humulene</b>            | <b>0.71</b>  | <b>0.89</b>  | <b>0.13</b> | <b>1.31</b>  |
| 1459               | 1461             | <i>cis</i> -Cadina-1(6),4-diene                | 0.00         | 0.00         | 0.00        | 0.02         |
| 1461               | 1464             | 9- <i>epi</i> -( <i>E</i> )-Caryophyllene      | 0.02         | 0.00         | 0.01        | 0.00         |
| 1463               | 1463             | <i>cis</i> -Muurolo-4(14),5-diene              | 0.10         | 0.02         | 0.00        | 0.03         |
| 1470               | 1471             | 4,5-di- <i>epi</i> -Aristolochene              | 0.00         | 0.00         | 0.00        | 0.00         |
| 1472               | 1472             | <i>trans</i> -Cadina-1(6),4-diene              | 0.04         | 0.06         | 0.01        | 0.24         |
| 1473               | 1475             | Selina-4,11-diene                              | 0.00         | 0.00         | 0.00        | 0.00         |
| <b>1475</b>        | <b>1478</b>      | <b><math>\gamma</math>-Muurolene</b>           | <b>0.59</b>  | <b>0.67</b>  | <b>0.17</b> | <b>1.59</b>  |
| 1478               | 1480             | <i>cis</i> -4,10-Epoxyamorphane                | 0.23         | 0.35         | 0.06        | 0.61         |
| 1478               | 1483             | $\alpha$ -Amorphene                            | 0.00         | 0.00         | 0.00        | 0.00         |
| <b>1482</b>        | <b>1480</b>      | <b>Germacrene D</b>                            | <b>9.92</b>  | <b>0.16</b>  | <b>0.22</b> | <b>0.16</b>  |
| 1487               | 1488             | $\delta$ -Selinene                             | 0.00         | 0.02         | 0.00        | 0.02         |
| 1488               | 1491             | Eremophilene                                   | 0.00         | 0.00         | 0.00        | 0.00         |
| 1490               | 1487             | $\beta$ -Selinene                              | 0.13         | 0.03         | 0.00        | 0.14         |
| 1493               | 1490             | $\gamma$ -Amorphene                            | 0.22         | 0.14         | 0.01        | 0.34         |
| 1496               | 1497             | $\alpha$ -Selinene                             | 0.00         | 0.00         | 0.00        | 0.00         |
| 1496               | 1498             | <i>epi</i> -Cubebol                            | 0.44         | 0.47         | 0.08        | 1.48         |
| 1497               | 1498             | Bicyclogermacrene                              | 0.00         | 0.00         | 0.00        | 0.00         |
| <b>1499</b>        | <b>1497</b>      | <b><math>\alpha</math>-Muurolene</b>           | <b>0.71</b>  | <b>0.85</b>  | <b>0.22</b> | <b>1.88</b>  |
| 1502               | 1497             | Valencene                                      | 0.00         | 0.00         | 0.00        | 0.00         |
| 1502               | 1504             | <i>iso</i> -Daucene                            | 0.00         | 0.00         | 0.02        | 0.00         |
| 1503               | 1503             | ( <i>E,E</i> )- $\alpha$ -Farnesene            | 0.00         | 0.00         | 0.00        | 0.00         |
| 1503               | 1506             | $\delta$ -Amorphene                            | 0.00         | 0.03         | 0.00        | 0.05         |
| 1505               | 1505             | $\alpha$ -Bulnesene                            | 0.40         | 0.01         | 0.00        | 0.00         |
| 1508               | 1508             | $\beta$ -Bisabolene                            | 0.11         | 0.00         | 0.00        | 0.00         |
| 1509               | 1511             | Germacrene A                                   | 0.00         | 0.00         | 0.00        | 0.00         |
| 1514               | 1512             | $\gamma$ -Cadinene                             | 0.08         | 0.01         | 0.00        | 0.17         |
| <b>1516</b>        | <b>1519</b>      | <b>Cubebol</b>                                 | <b>0.68</b>  | <b>1.25</b>  | <b>0.18</b> | <b>2.09</b>  |
| <b>1518</b>        | <b>1518</b>      | <b><math>\delta</math>-Cadinene</b>            | <b>0.87</b>  | <b>0.60</b>  | <b>0.13</b> | <b>2.24</b>  |
| 1521               | 1519             | <i>trans</i> -Calamenene                       | 0.00         | 0.00         | 0.00        | 0.39         |
| 1523               | 1521             | Zonarene                                       | 0.07         | 0.09         | 0.00        | 0.15         |
| 1525               | 1524             | $\beta$ -Sesquiphellandrene                    | 0.00         | 0.00         | 0.00        | 0.00         |
| 1533               | 1536             | <i>trans</i> -Cadina-1,4-diene                 | 0.08         | 0.08         | 0.01        | 0.26         |
| 1537               | 1538             | $\alpha$ -Cadinene                             | 0.04         | 0.00         | 0.00        | 0.00         |
| 1541               | 1541             | $\alpha$ -Calacorene                           | 0.00         | 0.00         | 0.00        | 0.07         |
| 1548               | 1546             | $\alpha$ -Elemol                               | 0.04         | 0.03         | 0.02        | 0.00         |
| 1559               | 1557             | Germacrene B                                   | 0.09         | 0.03         | 0.00        | 0.00         |
| 1570               | 1566             | 1,5-Epoxyalvial-4(14)ene                       | 0.02         | 0.00         | 0.00        | 0.00         |
| 1577               | 1576             | Spathulenol                                    | 0.00         | 0.00         | 0.01        | 0.00         |
| 1578               | 1575             | Germacra-1(10),5-dien-4 $\beta$ -ol            | 0.14         | 0.00         | 0.00        | 0.00         |
| <b>1584</b>        | <b>1587</b>      | <b>Caryophyllene oxide</b>                     | <b>0.82</b>  | <b>1.47</b>  | <b>0.25</b> | <b>4.40</b>  |



| RI <sub>calc</sub> | RI <sub>db</sub> | Compound                                             | LD190910U   | LD190910V   | LD190910W   | LD190910X   |
|--------------------|------------------|------------------------------------------------------|-------------|-------------|-------------|-------------|
| 1596               | 1596             | Salvial-4(14)-en-1-one                               | 0.03        | 0.00        | 0.00        | 0.00        |
| 1600               | 1600             | Hexadecane                                           | 0.00        | 0.00        | 0.00        | 0.00        |
| 1615               | 1613             | Humulene epoxide II                                  | 0.03        | 0.04        | 0.00        | 0.00        |
| 1628               | 1623             | Humulane-1,6-dien-3-ol                               | 0.58        | 0.00        | 0.00        | 0.00        |
| 1628               | 1627             | Germacre-1(10),5-dien-4 $\alpha$ -ol                 | 0.04        | 0.11        | 0.01        | 0.14        |
| 1634               | 1631             | 1- <i>epi</i> -Cubenol                               | 0.06        | 0.00        | 0.00        | 0.33        |
| 1634               | ---              | Unidentified                                         | 0.32        | 0.41        | 0.09        | 1.14        |
| 1635               | 1629             | <i>iso</i> -Spathulenol                              | 0.00        | 0.15        | 0.03        | 0.00        |
| 1640               | 1633             | $\gamma$ -Eudesmol                                   | 0.00        | 0.01        | 0.00        | 0.00        |
| 1640               | 1642             | Caryophylla-4(12),8(13)-dien-5 $\alpha$ -ol          | 0.00        | 0.00        | 0.00        | 0.00        |
| 1641               | 1644             | Caryophylla-4(12),8(13)-dien-5 $\beta$ -ol           | 0.00        | 0.00        | 0.00        | 0.00        |
| 1642               | 1638             | (2 <i>S</i> ,5 <i>E</i> )-Caryophyll-5-en-12-al      | 0.00        | 0.00        | 0.00        | 0.00        |
| 1647               | 1643             | Cubenol                                              | 0.05        | 0.07        | 0.01        | 0.29        |
| <b>1650</b>        | <b>1651</b>      | <b><math>\alpha</math>-Muurolol</b>                  | <b>1.41</b> | <b>2.12</b> | <b>0.56</b> | <b>5.65</b> |
| 1658               | 1655             | $\alpha$ -Eudesmol                                   | 0.00        | 0.00        | 0.01        | 0.32        |
| 1658               | 1655             | $\alpha$ -Cadinol                                    | 0.04        | 0.00        | 0.00        | 0.00        |
| 1658               | 1656             | $\beta$ -Eudesmol                                    | 0.00        | 0.06        | 0.00        | 0.00        |
| 1660               | 1660             | Selin-11-en-4 $\alpha$ -ol                           | 0.35        | 0.00        | 0.00        | 0.00        |
| 1671               | 1666             | 14-Hydroxy-9- <i>epi</i> -( <i>E</i> )-caryophyllene | 0.00        | 0.00        | 0.00        | 0.28        |
| 1681               | 1676             | Bornyl 8-hydroxyisobutanoate                         | 0.00        | 0.00        | 0.00        | 0.14        |
| 2052               | 2050             | Bornyl hydrocinnamate                                | 0.00        | 0.00        | 0.00        | 0.00        |
| 2151               | 2152             | 3-Phenylpropyl 3-phenylpropanoate                    | 0.01        | 0.00        | 0.00        | 0.00        |
| <b>2224</b>        | <b>2223</b>      | <b>Bornyl cinnamate</b>                              | <b>0.59</b> | <b>0.42</b> | <b>0.27</b> | <b>0.16</b> |
| 2318               | 2321             | 3-Phenylpropyl cinnamate                             | 0.03        | 0.12        | 0.20        | 1.00        |
| 2434               | 2432             | Phenylallyl cinnamate                                | 0.00        | 0.00        | 0.00        | 0.19        |
|                    |                  | Monoterpene hydrocarbons                             | 44.63       | 41.96       | 82.08       | 13.32       |
|                    |                  | Oxygenated monoterpenoids                            | 2.95        | 7.58        | 7.29        | 2.13        |
|                    |                  | Sesquiterpene hydrocarbons                           | 45.97       | 42.50       | 8.68        | 65.64       |
|                    |                  | Oxygenated sesquiterpenoids                          | 4.96        | 6.12        | 1.22        | 15.59       |
|                    |                  | Benzenoid aromatics                                  | 0.90        | 1.24        | 0.67        | 1.37        |
|                    |                  | Others                                               | 0.00        | 0.00        | 0.00        | 0.00        |
|                    |                  | Total identified                                     | 99.41       | 99.40       | 99.94       | 98.05       |

RI<sub>calc</sub>: Retention indices determined with respect to a homologous series of *n*-alkanes on a ZB-5ms column. RI<sub>db</sub>: Retention indices from the databases. Compounds in **boldface** were used in the multivariate (HCA and PCA) analyses.

**Table S2.** Enantiomeric distribution, (+)-enantiomer% : (–)-enantiomer%, of monoterpenoids in *Liquidambar formosana* oleoresin essential oils.

| Sample    | Compounds         |                  |             |                 |                 |
|-----------|-------------------|------------------|-------------|-----------------|-----------------|
|           | $\alpha$ -Thujene | $\alpha$ -Pinene | Camphene    | $\beta$ -Pinene | Sabinene        |
| Re190401A | (+100 : –)0       | (+9.4 : –)90.6   | (+0 : –)100 | (+10.6 : –)89.4 | (+100 : –)0     |
| Re190401C | (+100 : –)0       | (+14.0 : –)86.0  | (+0 : –)100 | (+18.0 : –)82.0 | (+100 : –)0     |
| LD190910C | (+100 : –)0       | (+22.9 : –)77.1  | (+0 : –)100 | (+7.0 : –)93.0  | (+100 : –)0     |
| LD190910D | (+100 : –)0       | (+34.9 : –)65.1  | (+0 : –)100 | (+14.8 : –)85.2 | (+100 : –)0     |
| LD190910E | (+100 : –)0       | (+15.2 : –)84.8  | (+0 : –)100 | (+4.8 : –)95.2  | (+100 : –)0     |
| LD190910F | (+100 : –)0       | (+21.0 : –)79.0  | (+0 : –)100 | (+16.1 : –)83.9 | (+100 : –)0     |
| LD190910H | (+100 : –)0       | (+21.5 : –)78.5  | (+0 : –)100 | (+31.4 : –)68.6 | (+100 : –)0     |
| LD190910I | (+100 : –)0       | (+11.2 : –)88.8  | (+0 : –)100 | (+14.6 : –)85.4 | (+87.8 : –)12.2 |
| LD190910J | (+100 : –)0       | (+18.2 : –)81.8  | (+0 : –)100 | (+5.3 : –)94.7  | (+100 : –)0     |
| LD190910K | (+100 : –)0       | (+8.1 : –)91.9   | (+0 : –)100 | (+8.6 : –)91.4  | (+100 : –)0     |
| LD190910L | (+100 : –)0       | (+5.4 : –)94.6   | (+0 : –)100 | (+3.7 : –)96.3  | (+84.9 : –)15.1 |
| LD190910M | (+100 : –)0       | (+34.9 : –)65.1  | (+0 : –)100 | (+14.8 : –)85.2 | (+100 : –)0     |
| LD190910N | (+100 : –)0       | (+4.5 : –)95.5   | (+0 : –)100 | (+43.3 : –)56.7 | (+100 : –)0     |
| LD190910O | (+100 : –)0       | (+12.2 : –)87.8  | (+0 : –)100 | (+4.9 : –)95.1  | (+85.7 : –)14.3 |
| LD190910P | (+100 : –)0       | (+12.2 : –)87.8  | (+0 : –)100 | (+4.9 : –)95.1  | (+86.8 : –)13.2 |
| LD190910Q | (+100 : –)0       | (+4.4 : –)95.6   | (+0 : –)100 | (+2.4 : –)97.6  | (+100 : –)0     |
| LD190910R | (+100 : –)0       | (+7.2 : –)92.8   | (+0 : –)100 | (+7.0 : –)93.0  | (+100 : –)0     |
| LD190910S | (+100 : –)0       | (+5.0 : –)95.0   | (+0 : –)100 | (+3.5 : –)96.5  | (+100 : –)0     |
| LD190910T | (+100 : –)0       | (+5.4 : –)94.6   | (+0 : –)100 | (+5.4 : –)94.6  | (+100 : –)0     |
| LD190910U | (+100 : –)0       | (+6.1 : –)93.9   | (+0 : –)100 | (+3.4 : –)96.6  | (+68.2 : –)31.8 |
| LD190910V | (+100 : –)0       | (+4.4 : –)95.6   | (+0 : –)100 | (+3.3 : –)96.7  | (+100 : –)0     |
| LD190910W | (+100 : –)0       | (+21.5 : –)78.5  | (+0 : –)100 | (+31.3 : –)68.7 | (+100 : –)0     |
| LD190910X | n.d.              | (+29.6 : –)70.4  | (+0 : –)100 | (+24.6 : –)75.4 | n.d.            |

<sup>a</sup> n.d.: Not determined; concentration too low.

**Table S2.** Continued.

| Sample    | Compounds   |             |                 |             |                     |                   |
|-----------|-------------|-------------|-----------------|-------------|---------------------|-------------------|
|           | Limonene    | Camphor     | Terpinen-4-ol   | Borneol     | $\alpha$ -Terpineol | Bornyl acetate    |
| Re190401A | (+0 : –)100 | (+100 : –)0 | (+36.0 : –)64.0 | (+0 : –)100 | (+6.7 : –)93.3      | n.d. <sup>a</sup> |
| Re190401C | (+0 : –)100 | (+100 : –)0 | (+48.1 : –)51.9 | (+0 : –)100 | (+13.4 : –)86.6     | n.d.              |
| LD190910C | (+0 : –)100 | (+100 : –)0 | (+20.2 : –)79.8 | (+0 : –)100 | (+8.0 : –)92.0      | (+0 : –)100       |
| LD190910D | (+0 : –)100 | (+100 : –)0 | (+38.2 : –)61.8 | n.d.        | (+16.2 : –)83.8     | (+0 : –)100       |
| LD190910E | (+0 : –)100 | (+100 : –)0 | (+18.6 : –)81.4 | (+0 : –)100 | (+6.9 : –)93.1      | (+0 : –)100       |
| LD190910F | (+0 : –)100 | (+100 : –)0 | n.d.            | (+0 : –)100 | n.d.                | (+0 : –)100       |
| LD190910H | (+0 : –)100 | (+100 : –)0 | n.d.            | (+0 : –)100 | n.d.                | (+0 : –)100       |
| LD190910I | (+0 : –)100 | (+100 : –)0 | n.d.            | (+0 : –)100 | n.d.                | (+0 : –)100       |
| LD190910J | (+0 : –)100 | (+100 : –)0 | (+26.0 : –)74.0 | (+0 : –)100 | n.d.                | (+0 : –)100       |
| LD190910K | (+0 : –)100 | (+100 : –)0 | n.d.            | (+0 : –)100 | n.d.                | (+0 : –)100       |
| LD190910L | (+0 : –)100 | (+100 : –)0 | n.d.            | n.d.        | n.d.                | n.d.              |
| LD190910M | (+0 : –)100 | (+100 : –)0 | (+38.2 : –)61.8 | n.d.        | (+16.2 : –)83.8     | (+0 : –)100       |
| LD190910N | (+0 : –)100 | (+100 : –)0 | n.d.            | n.d.        | n.d.                | (+0 : –)100       |
| LD190910O | (+0 : –)100 | (+100 : –)0 | n.d.            | (+0 : –)100 | n.d.                | (+0 : –)100       |
| LD190910P | (+0 : –)100 | (+100 : –)0 | n.d.            | (+0 : –)100 | n.d.                | (+0 : –)100       |
| LD190910Q | (+0 : –)100 | (+100 : –)0 | n.d.            | (+0 : –)100 | n.d.                | (+0 : –)100       |
| LD190910R | (+0 : –)100 | n.d.        | n.d.            | n.d.        | n.d.                | (+0 : –)100       |
| LD190910S | (+0 : –)100 | (+100 : –)0 | n.d.            | n.d.        | (+2.9 : –)97.1      | (+0 : –)100       |
| LD190910T | (+0 : –)100 | (+100 : –)0 | n.d.            | n.d.        | (+20.7 : –)79.3     | (+0 : –)100       |
| LD190910U | (+0 : –)100 | (+100 : –)0 | n.d.            | n.d.        | (+0 : –)100         | (+0 : –)100       |
| LD190910V | (+0 : –)100 | (+100 : –)0 | n.d.            | n.d.        | (+0 : –)100         | (+0 : –)100       |
| LD190910W | (+0 : –)100 | n.d.        | n.d.            | n.d.        | (+10.5 : –)89.5     | (+0 : –)100       |
| LD190910X | (+0 : –)100 | n.d.        | n.d.            | n.d.        | n.d.                | (+0 : –)100       |

<sup>a</sup> n.d.: Not determined; concentration too low.
